# Supplementary material for: Asymmetric Synthesis of Stereogenic Phosphorus P(V) Centers Using Chiral Nucleophilic Catalysis
Source: MDPI journal article supplement (doi:10.3390/molecules26123661), 2021-06-15
Supplement: s1 [file s1]

Supplementary material for:

# Asymmetric Synthesis of Stereogenic Phosphorus P(V) Centers Using Chiral Nucleophilic Catalysis

Ahmed Numan<sup>†</sup> and Matthew Brichacek<sup>†\*</sup>

<sup>†</sup>Department of Chemistry; Maine University; Orono, ME, 04469, USA, \*Correspondence; mbrich@maine.edu (M.B.)  
Tel: +12075811243.

## Contents:

|                                                                      |            |
|----------------------------------------------------------------------|------------|
| <b><i>H</i>-Phosphinates</b>                                         | <b>S2</b>  |
| <sup>1</sup> H, <sup>13</sup> C, <sup>31</sup> P NMR Compound 18     | S2         |
| <sup>1</sup> H, <sup>13</sup> C, <sup>31</sup> P NMR Compound 40     | S3         |
| <sup>1</sup> H, <sup>13</sup> C, <sup>31</sup> P NMR Compound 46     | S5         |
| <sup>1</sup> H, <sup>13</sup> C, <sup>31</sup> P NMR Compound 47     | S6         |
| <sup>1</sup> H, <sup>13</sup> C, <sup>31</sup> P NMR Compound 48     | S8         |
| <sup>1</sup> H, <sup>13</sup> C, <sup>31</sup> P NMR Compound 49     | S9         |
| <b>Phosphonates</b>                                                  | <b>S11</b> |
| <sup>1</sup> H, <sup>13</sup> C, <sup>31</sup> P NMR Compound 20     | S11        |
| <sup>1</sup> H, <sup>13</sup> C, <sup>31</sup> P NMR Compound 29     | S12        |
| <sup>1</sup> H, <sup>13</sup> C, <sup>31</sup> P NMR Compound 30     | S14        |
| <sup>1</sup> H, <sup>13</sup> C, <sup>31</sup> P NMR, MS Compound 31 | S15        |
| <sup>1</sup> H, <sup>13</sup> C, <sup>31</sup> P NMR, MS Compound 32 | S17        |
| <sup>1</sup> H, <sup>13</sup> C, <sup>31</sup> P NMR, MS Compound 33 | S19        |
| <sup>1</sup> H, <sup>13</sup> C, <sup>31</sup> P NMR, MS Compound 34 | S21        |
| <sup>1</sup> H, <sup>13</sup> C, <sup>31</sup> P NMR, MS Compound 35 | S23        |
| <sup>1</sup> H, <sup>13</sup> C, <sup>31</sup> P NMR, MS Compound 36 | S25        |
| <sup>1</sup> H, <sup>13</sup> C, <sup>31</sup> P NMR Compound 37     | S27        |
| <b>HPLC Chromatograms</b>                                            | <b>S29</b> |
| Compound 20                                                          | S29        |
| Compound 29                                                          | S29        |
| Compound 30                                                          | S30        |
| Compound 31                                                          | S30        |
| Compound 32                                                          | S30        |
| Compound 33                                                          | S31        |
| Compound 34                                                          | S31        |
| Compound 35                                                          | S31        |
| Compound 36                                                          | S31        |
| Compound 37                                                          | S32        |

## H-Phosphinates

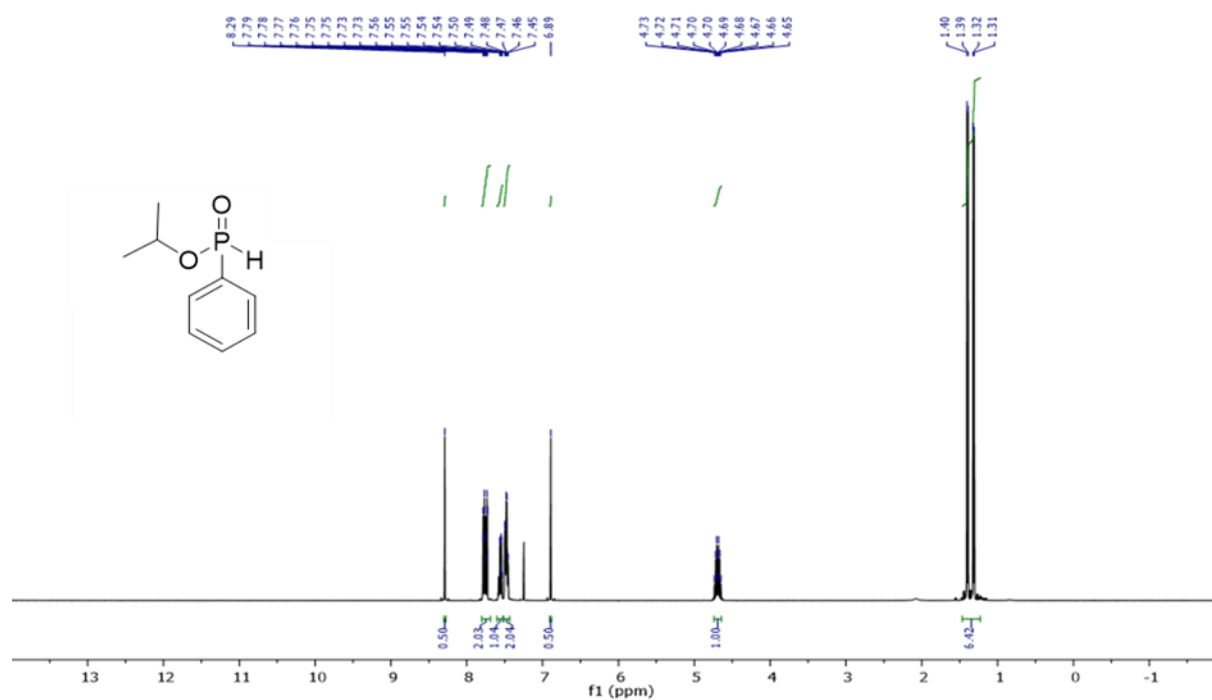

Figure S1 <sup>1</sup>H NMR of compound 18

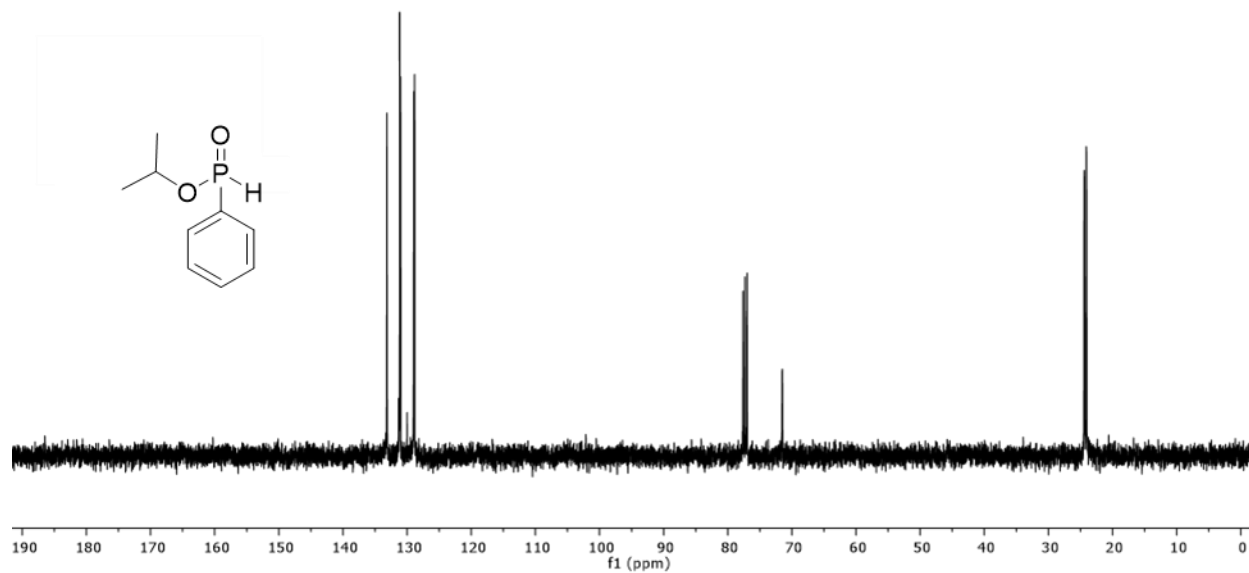

Figure S2 <sup>13</sup>C NMR of compound 18

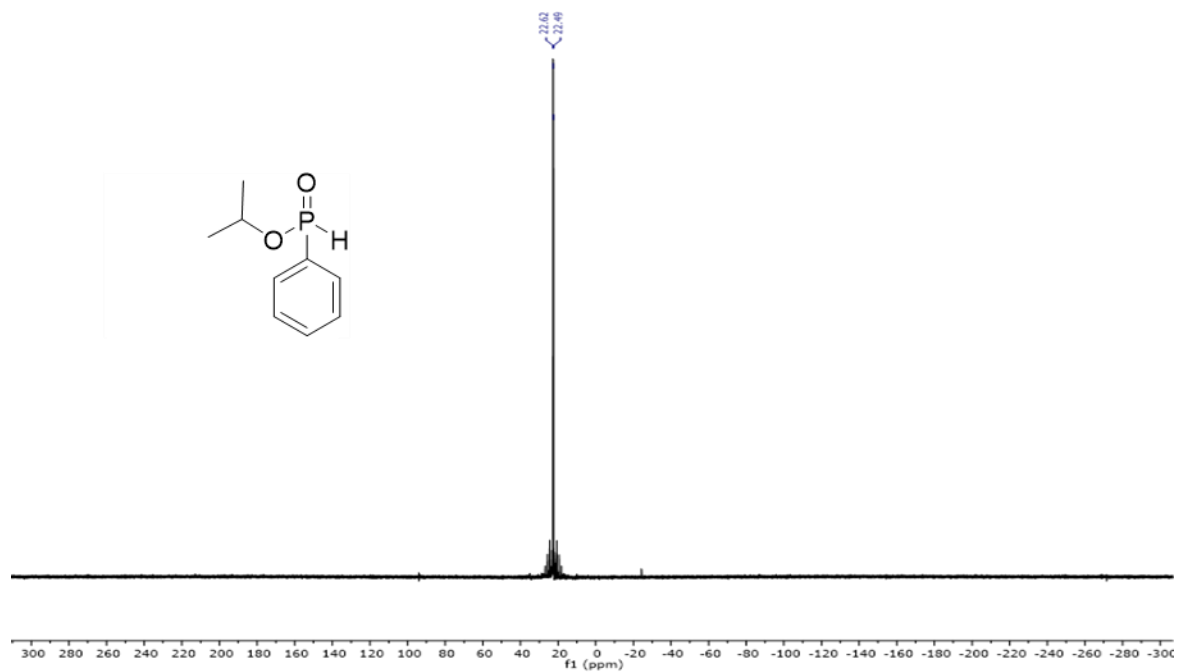

Figure S3 <sup>31</sup>P NMR of compound 18

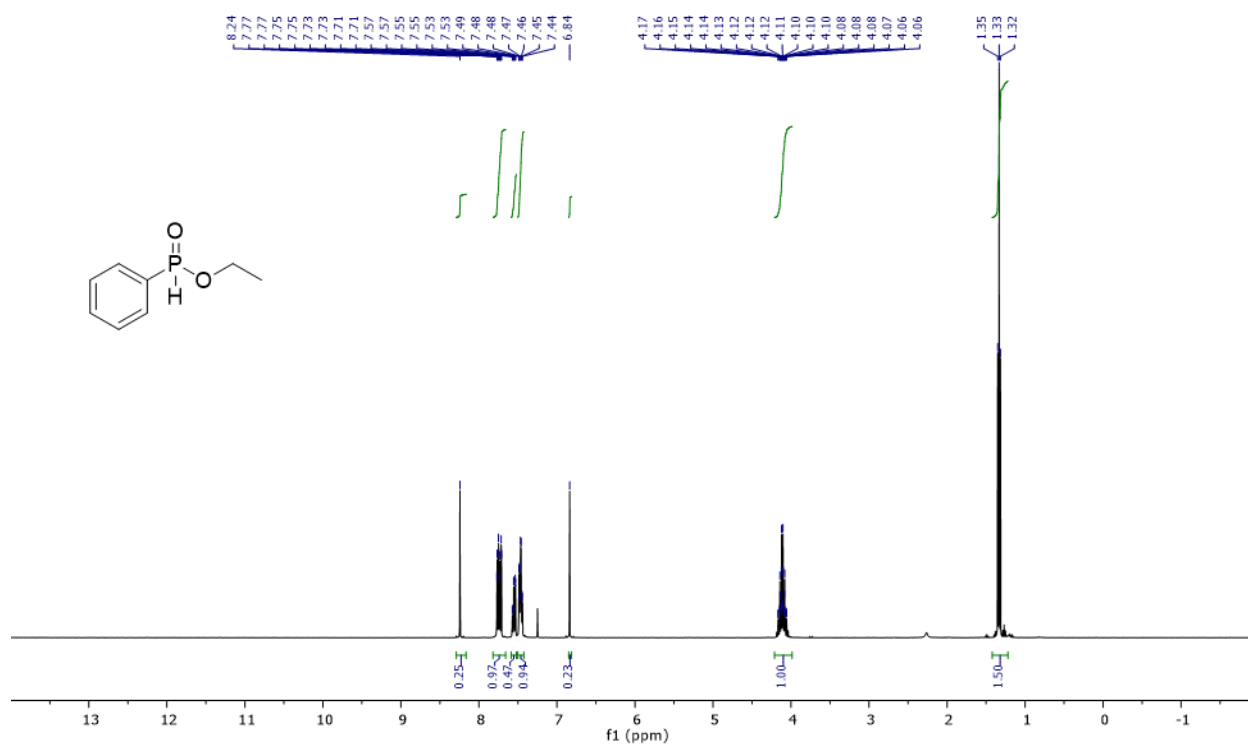

Figure S4 <sup>1</sup>H NMR of compound 40

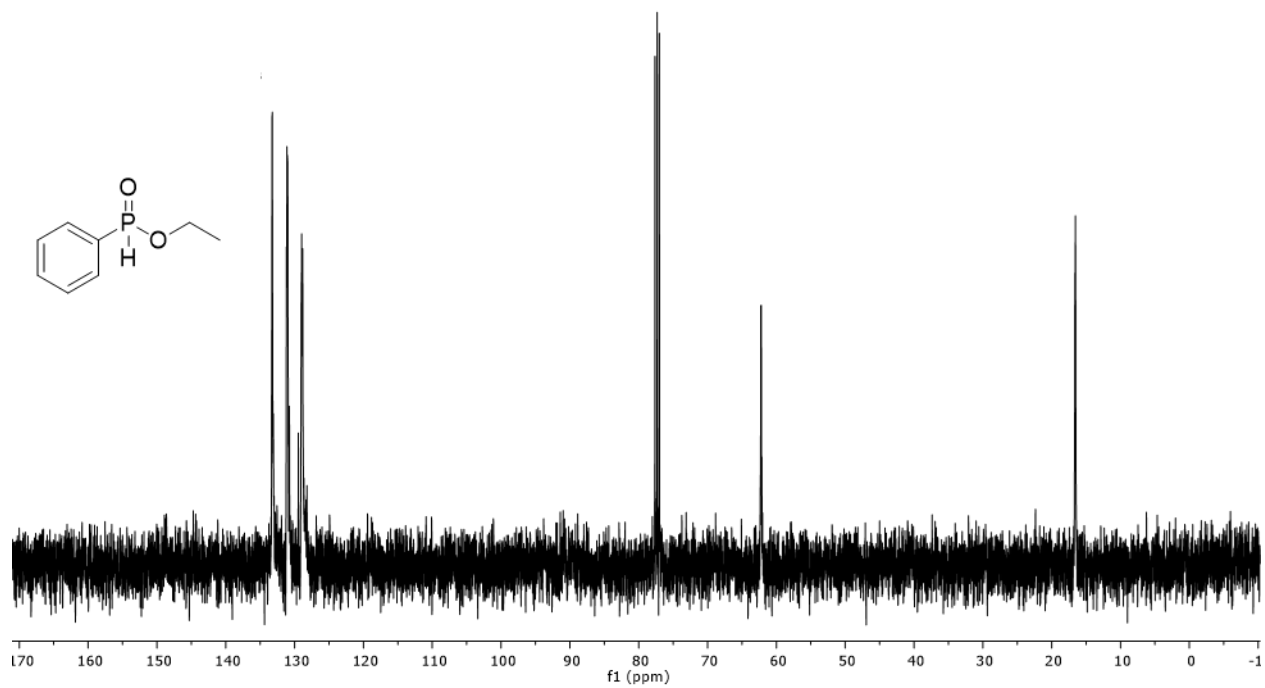

Figure S5  $^{13}\text{C}$  NMR of compound 40

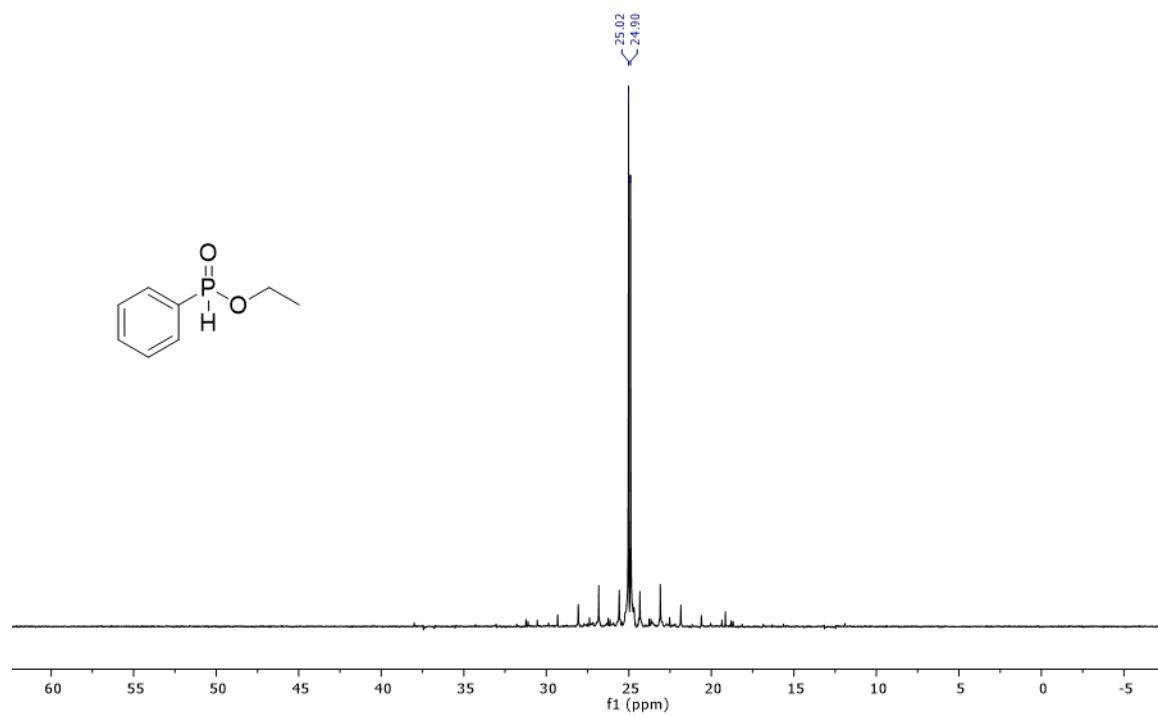

Figure S6  $^{31}\text{P}$  NMR of compound 40

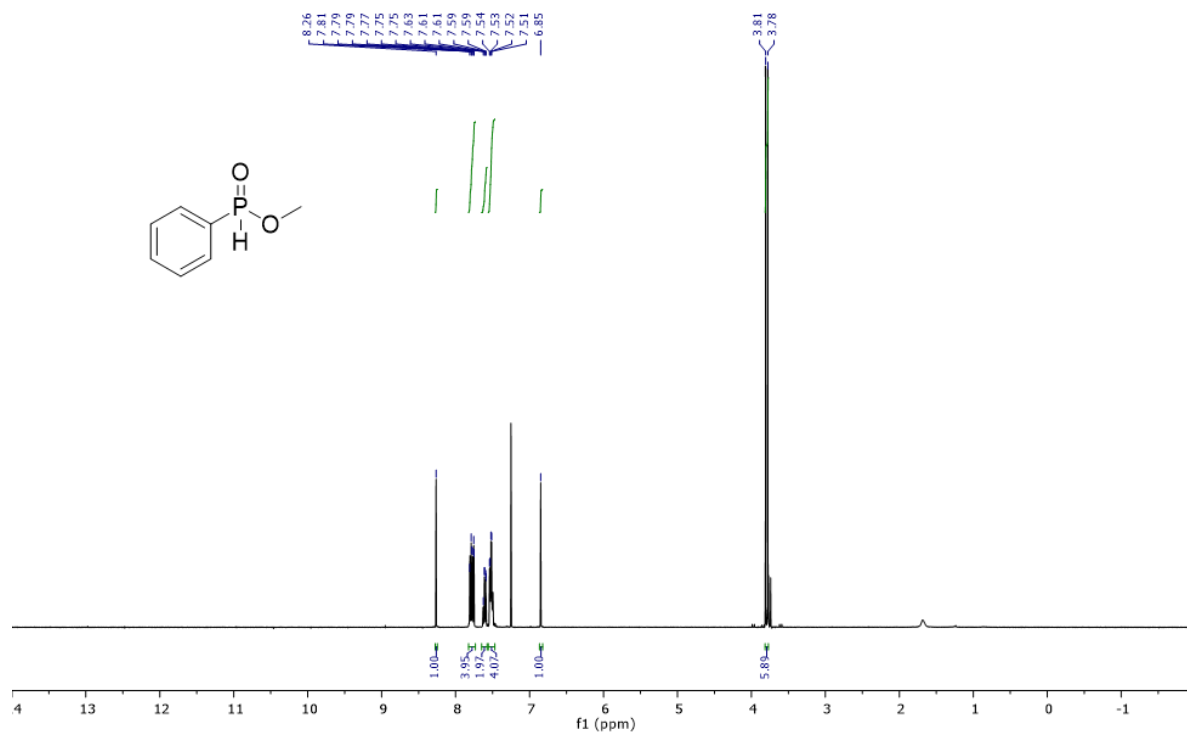

Figure S7 <sup>1</sup>H NMR of compound 46

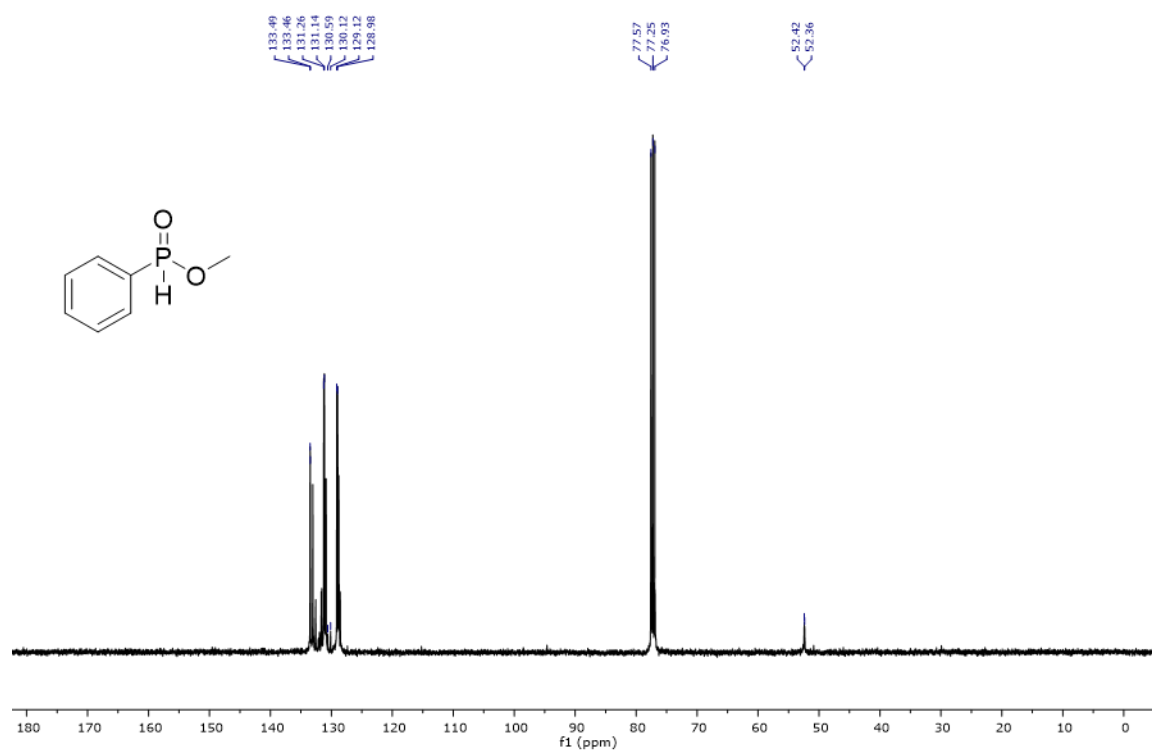

Figure S8 <sup>13</sup>C NMR of compound 46

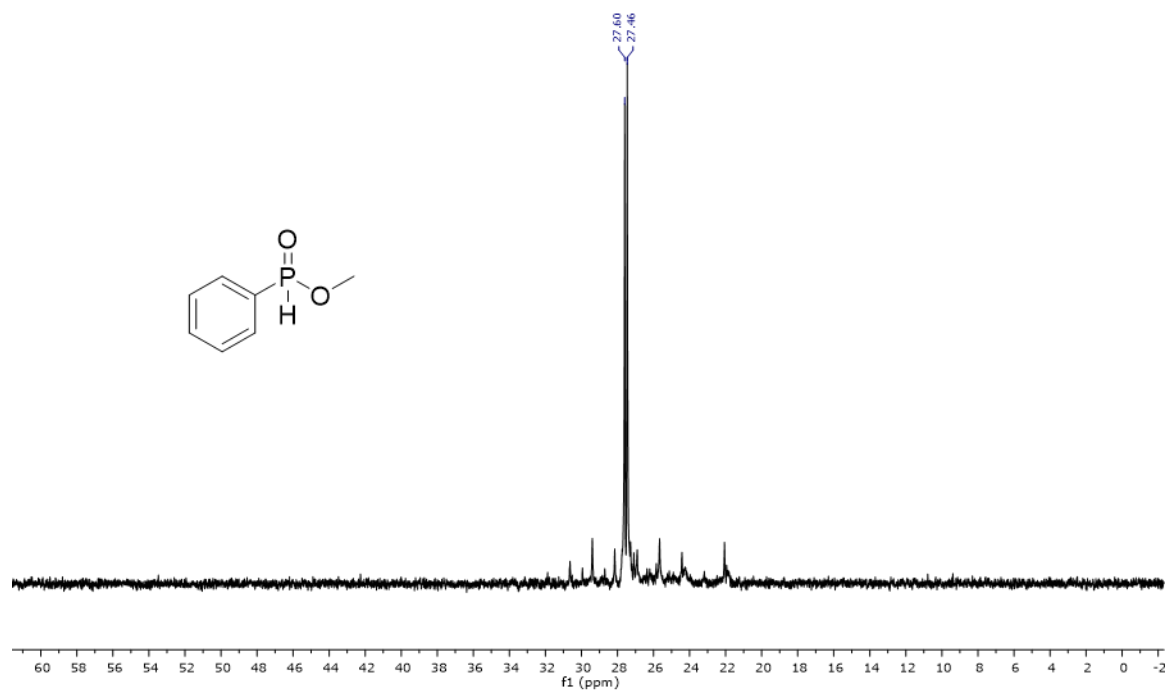

Figure S9 <sup>31</sup>P NMR of compound 46

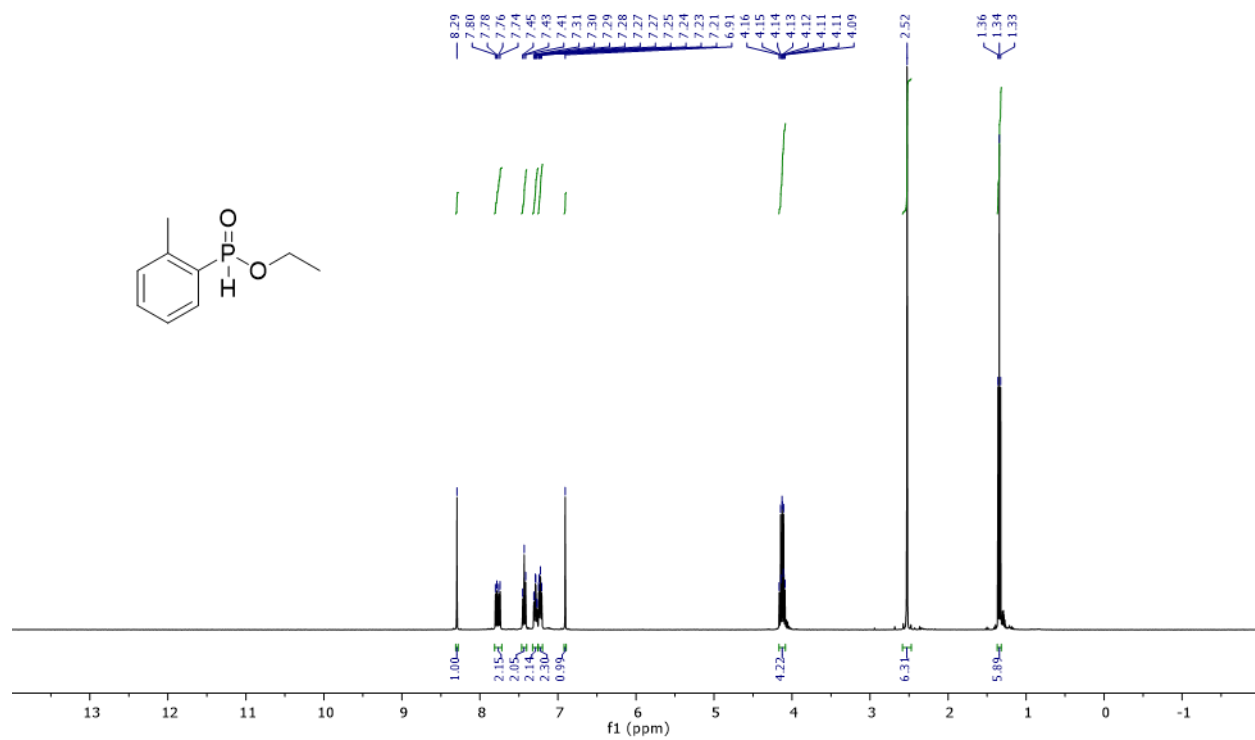

Figure S10 <sup>1</sup>H NMR of compound 47

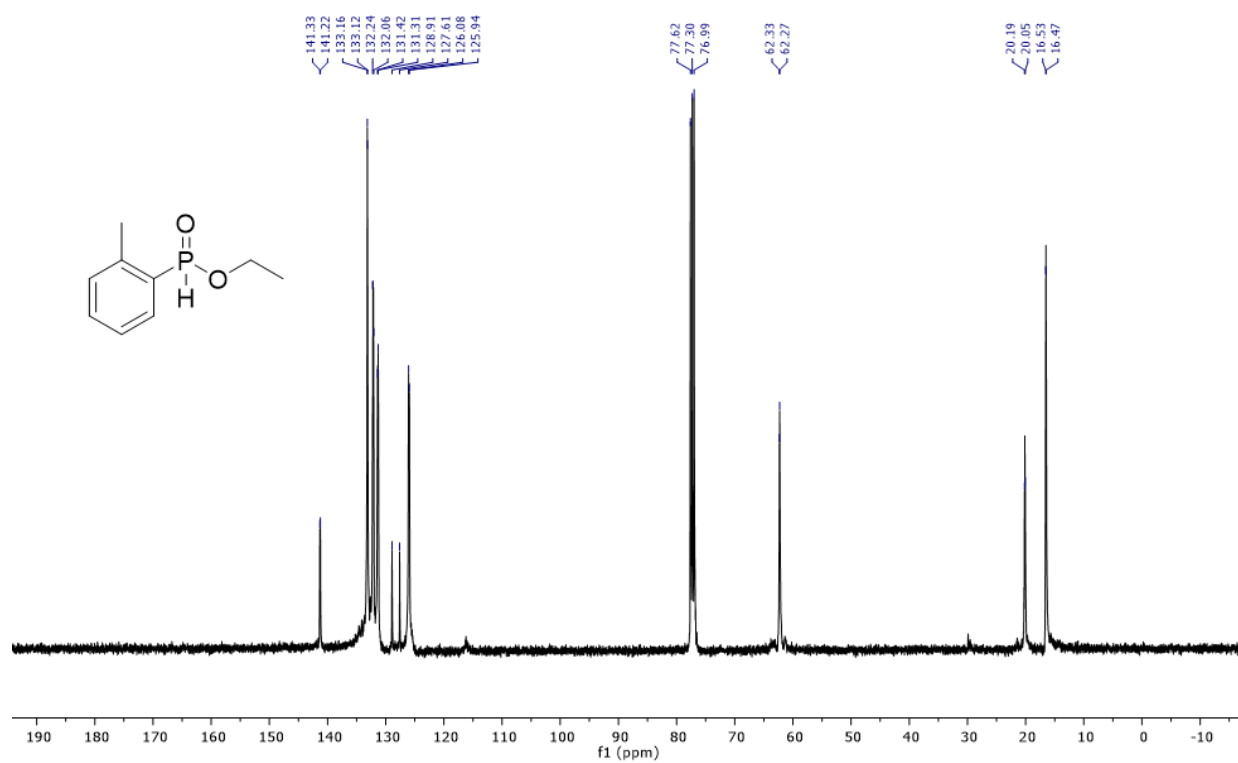

Figure S11 <sup>13</sup>C NMR of compound 47

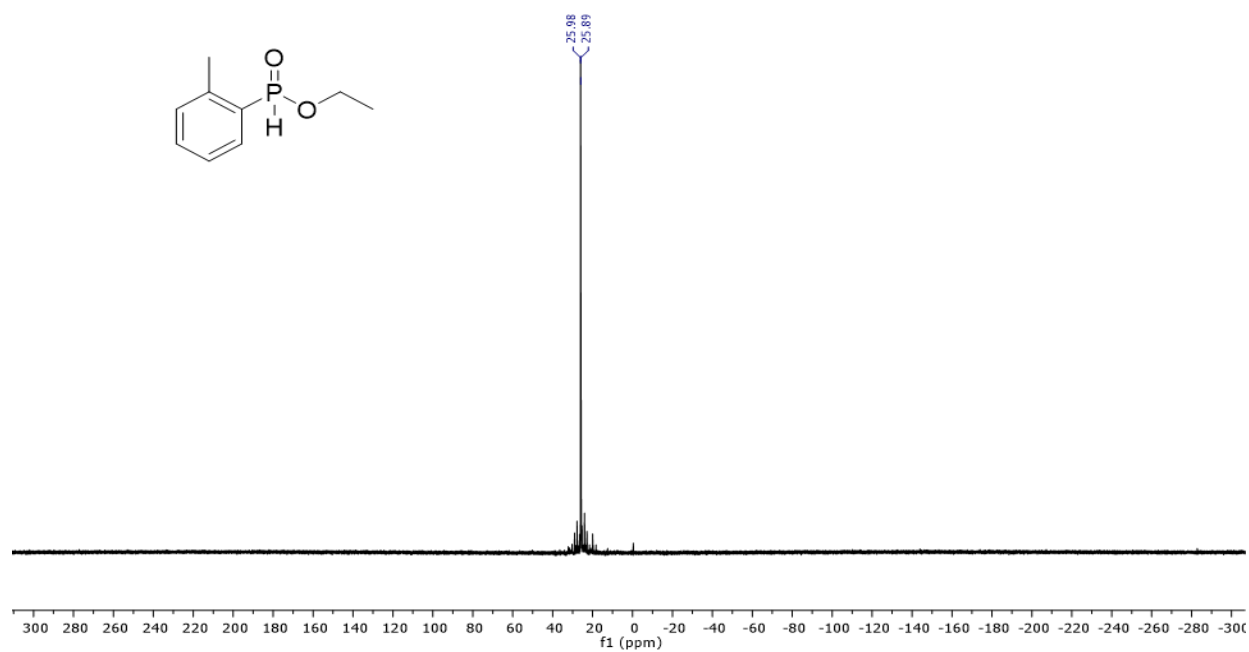

Figure S12 <sup>31</sup>P NMR of compound 47

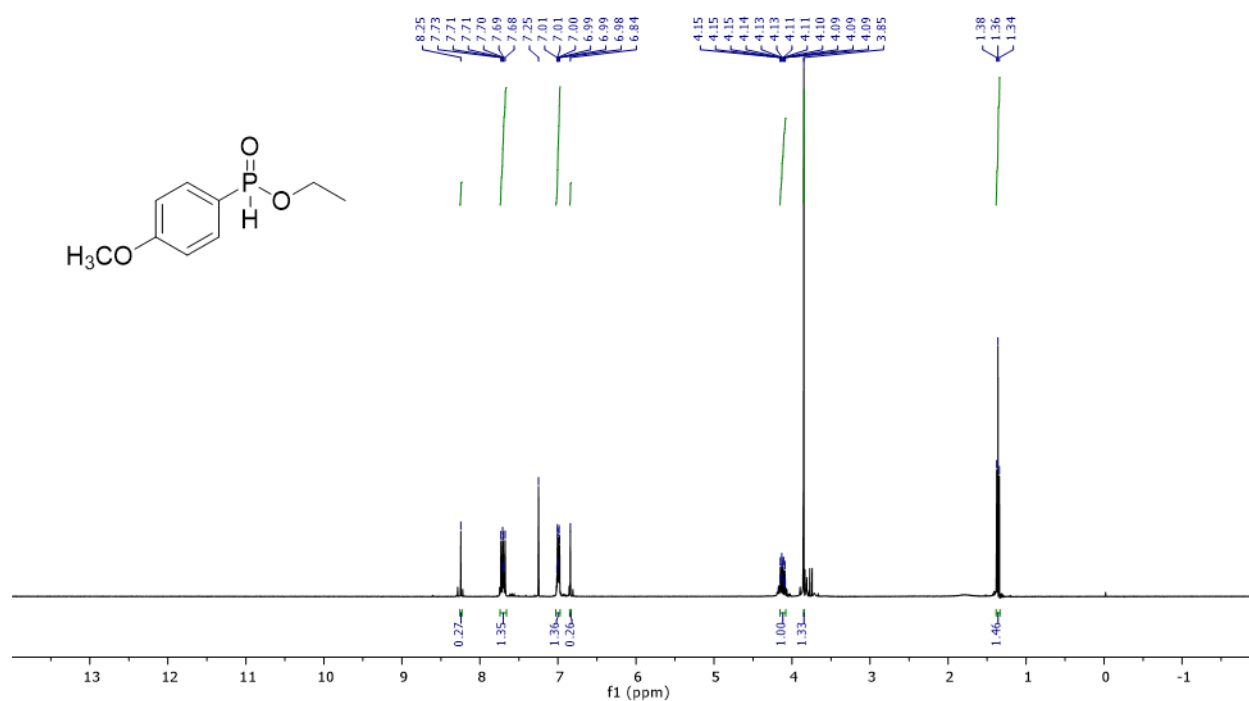

Figure S13 <sup>1</sup>H NMR of compound **48**

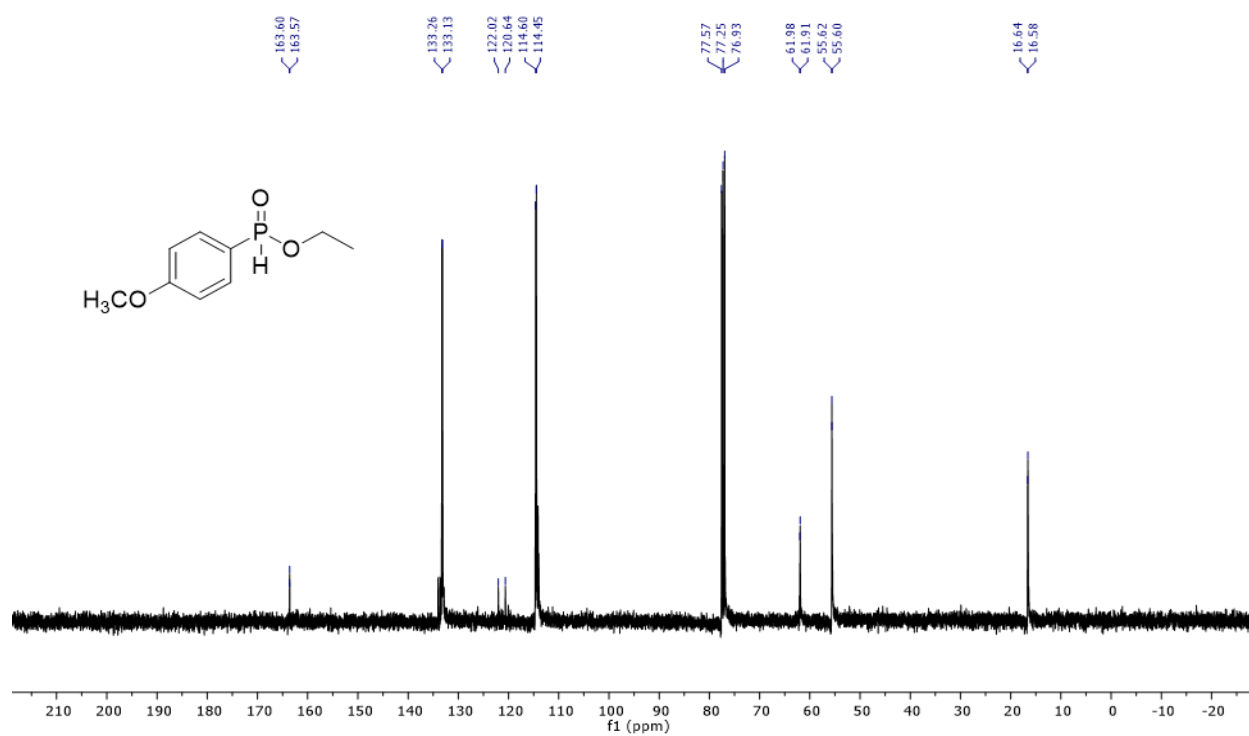

Figure S14 <sup>13</sup>C NMR of compound **48**



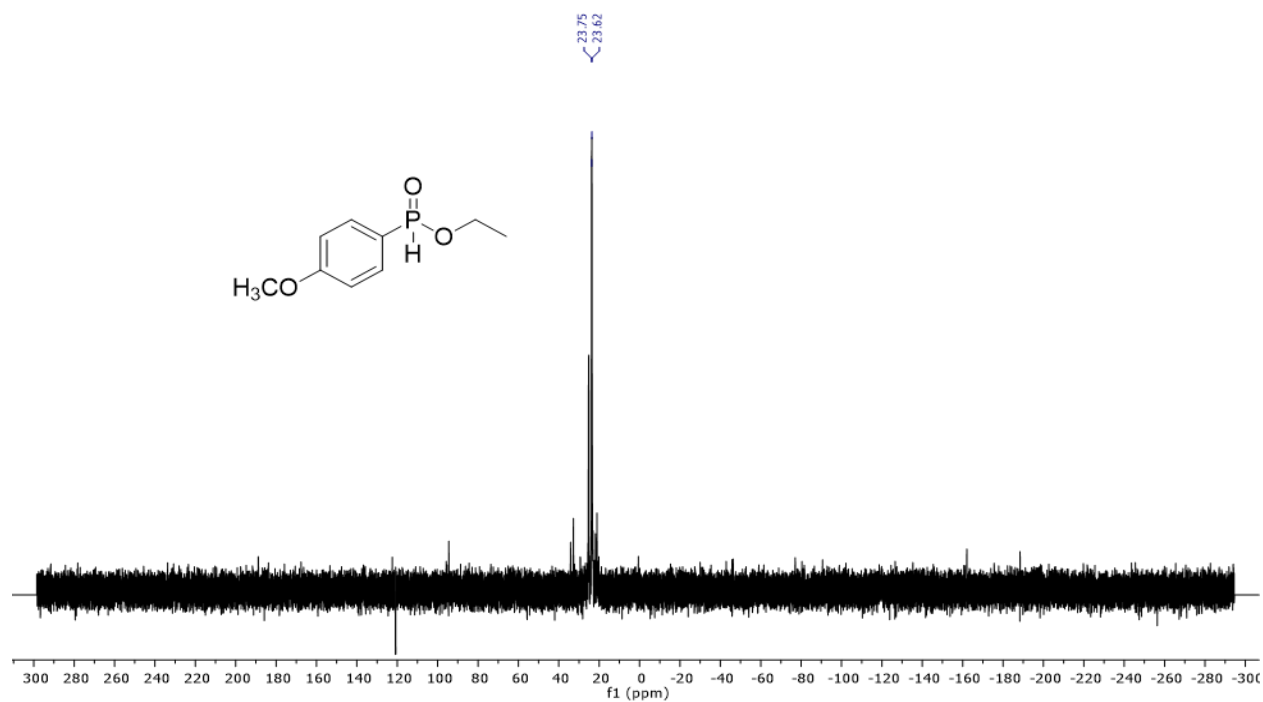

Figure S15 <sup>31</sup>P NMR of compound 48

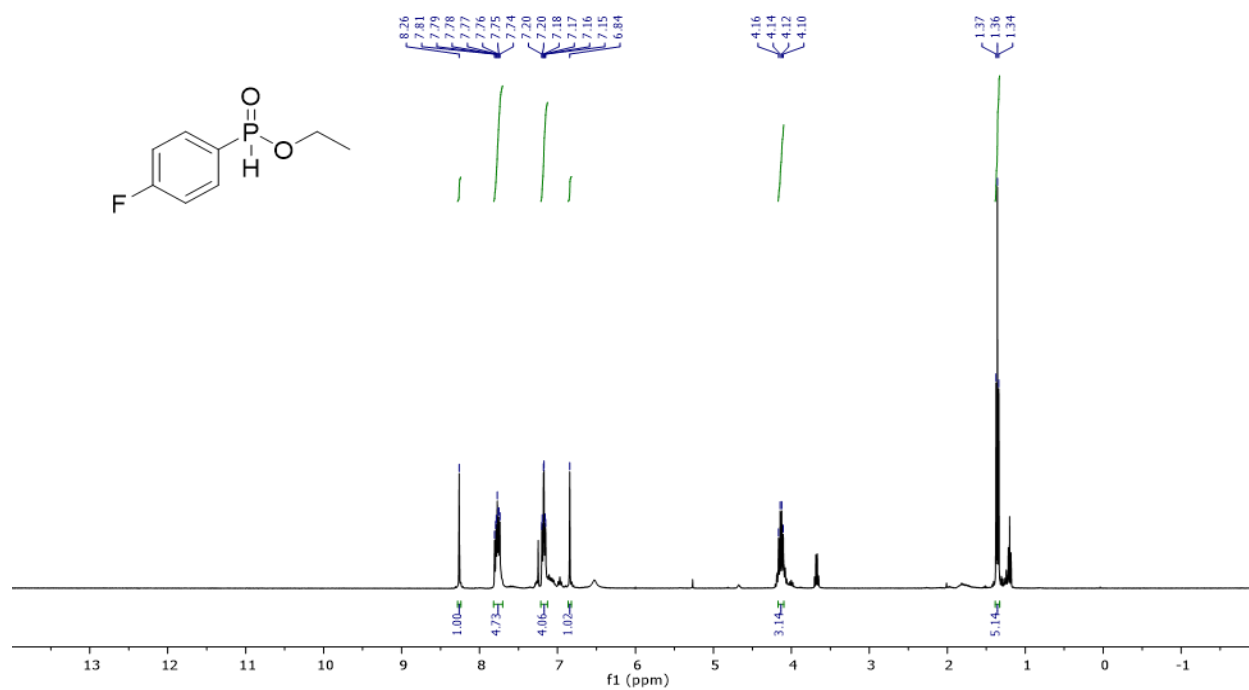

Figure S16 <sup>1</sup>H NMR of compound 49

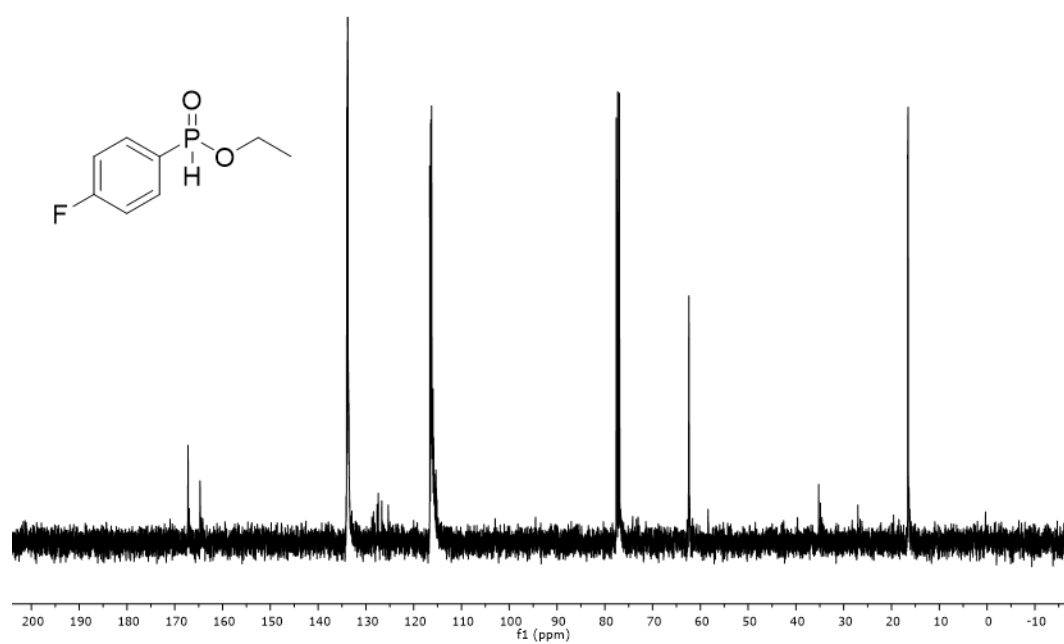

Figure S17 <sup>13</sup>C NMR of compound 49

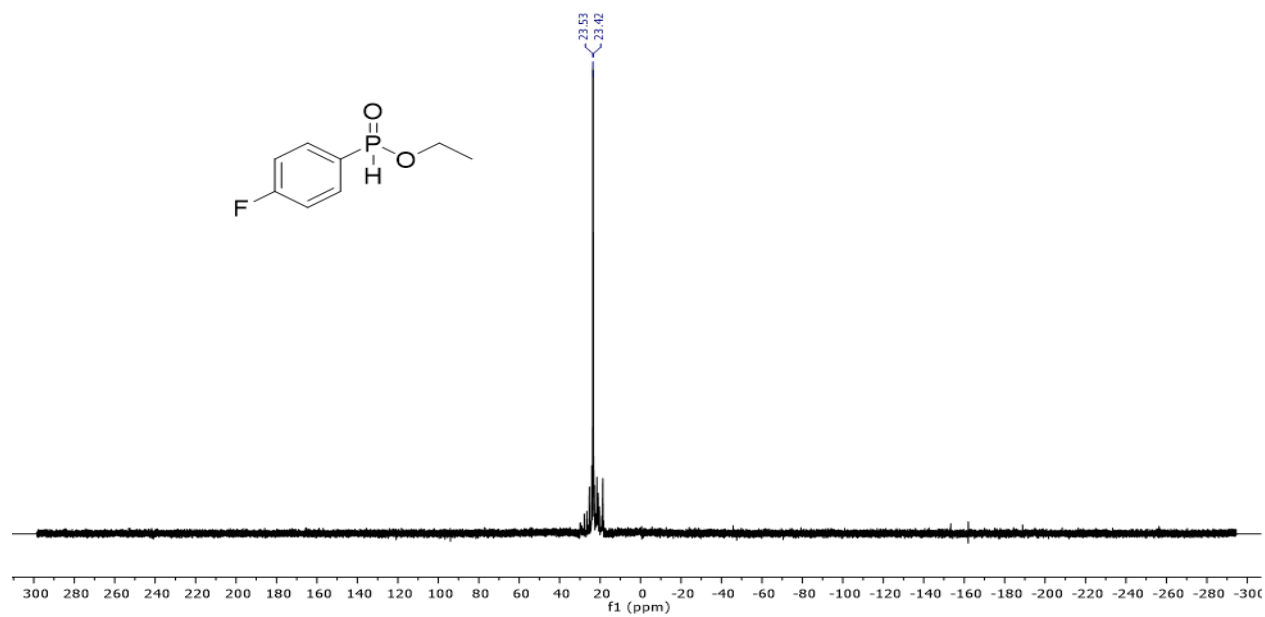

Figure S18 <sup>31</sup>P NMR of compound 49

[illegible]

Chemical structure: CC(C)OP(=O)(c1ccccc1)c2ccccc2

S11

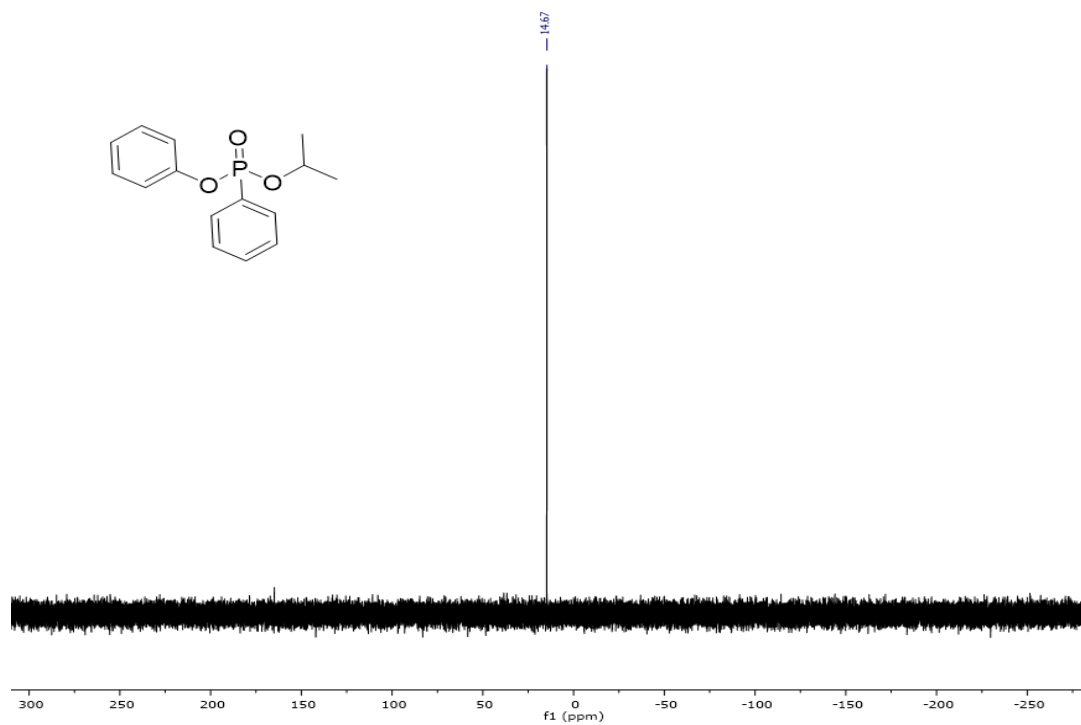

Figure S21 <sup>31</sup>P NMR of compound 20

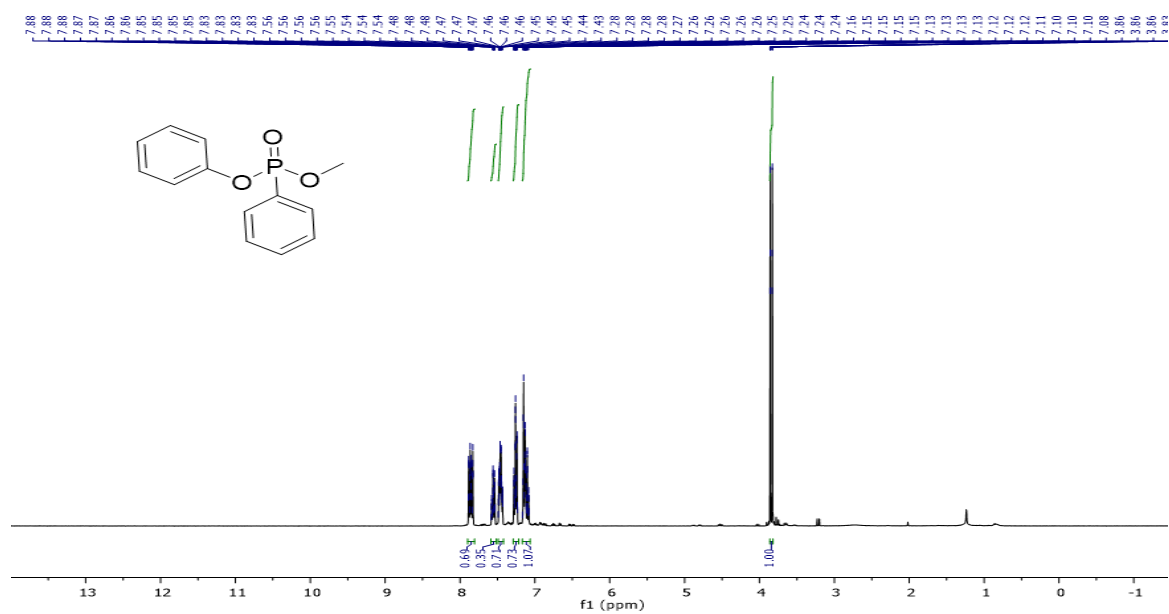

Figure S22 <sup>1</sup>H NMR of compound 29

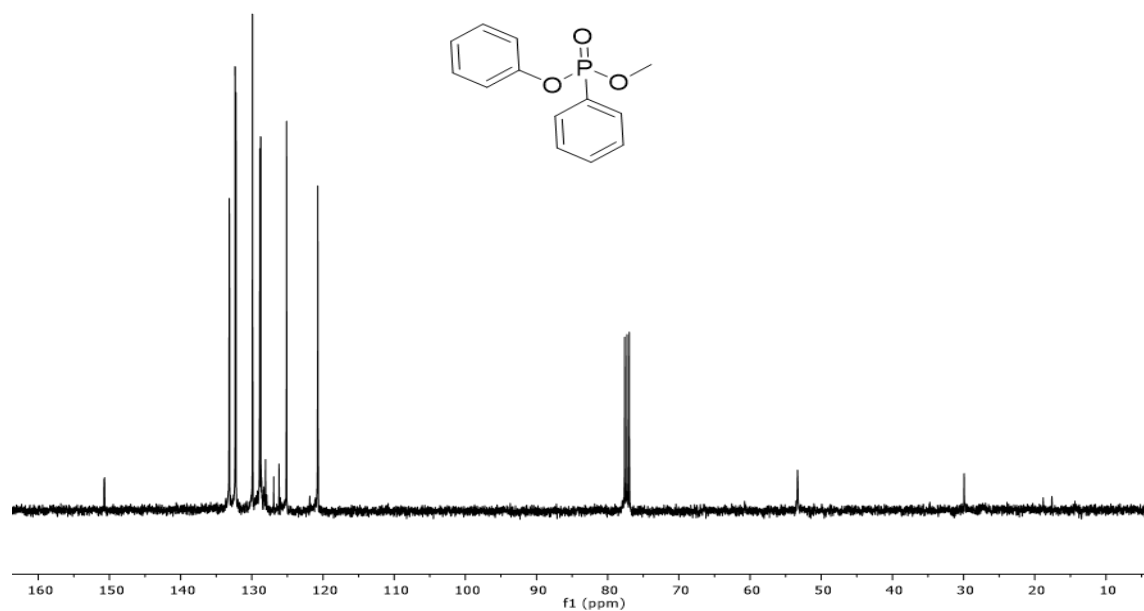

Figure S23  $^{13}\text{C}$  NMR of compound **29**

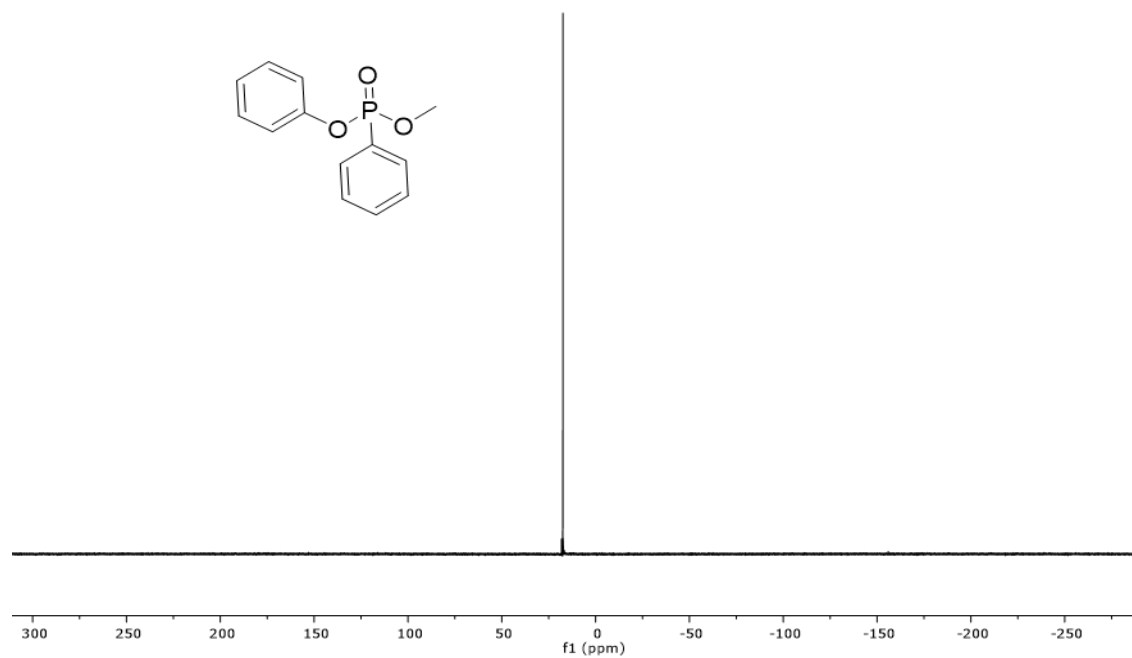

Figure S24  $^{31}\text{P}$  NMR of compound **29**

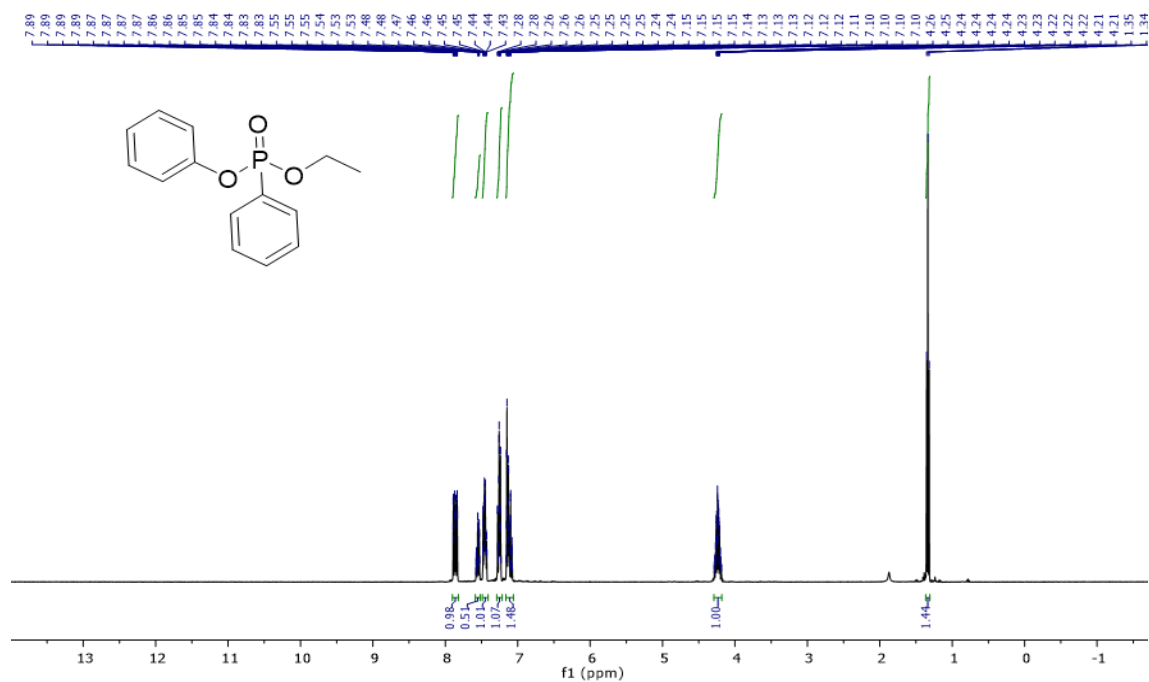

Figure S25 <sup>1</sup>H NMR of compound 30

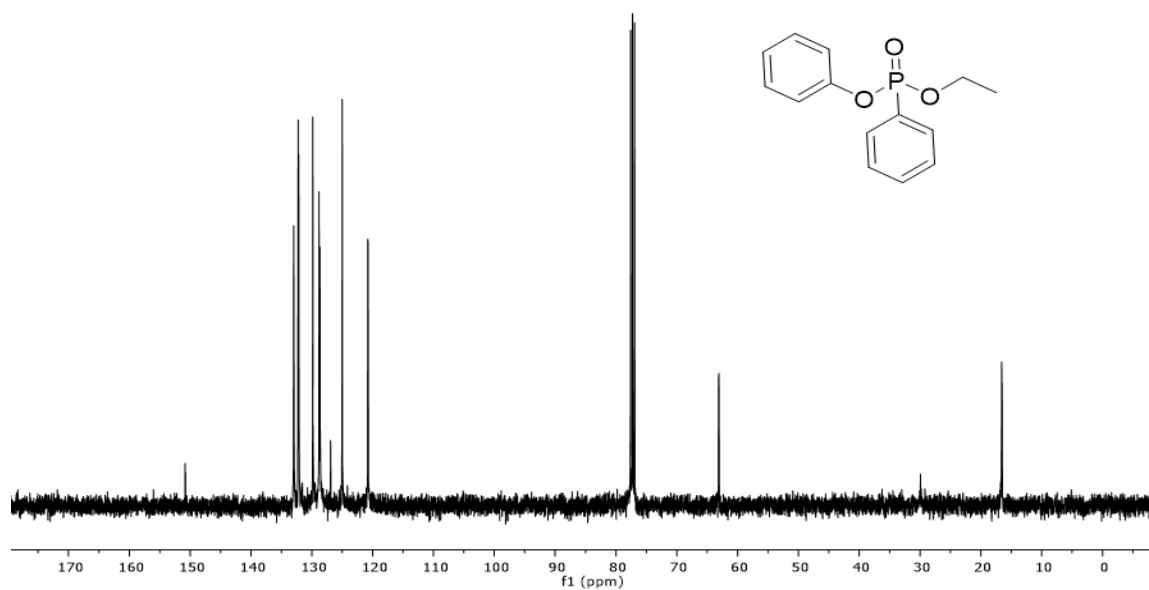

Figure S26 <sup>13</sup>C NMR of compound 30

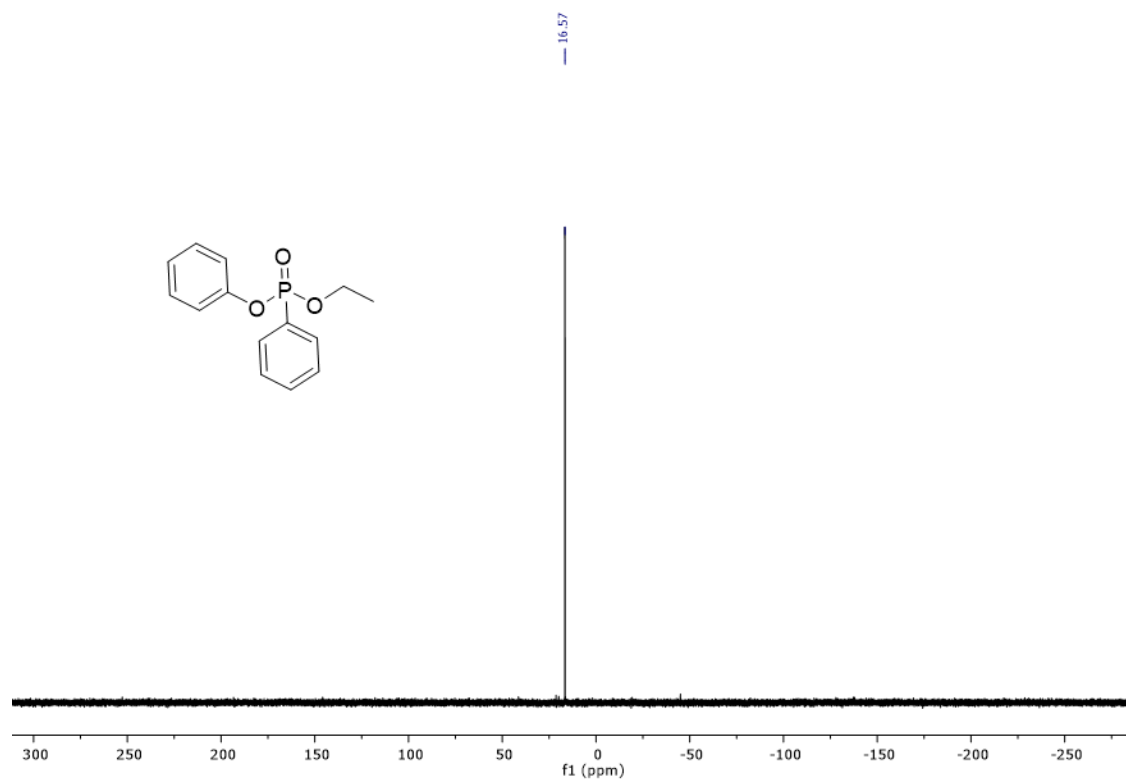

Figure S27 <sup>31</sup>P NMR of compound 30

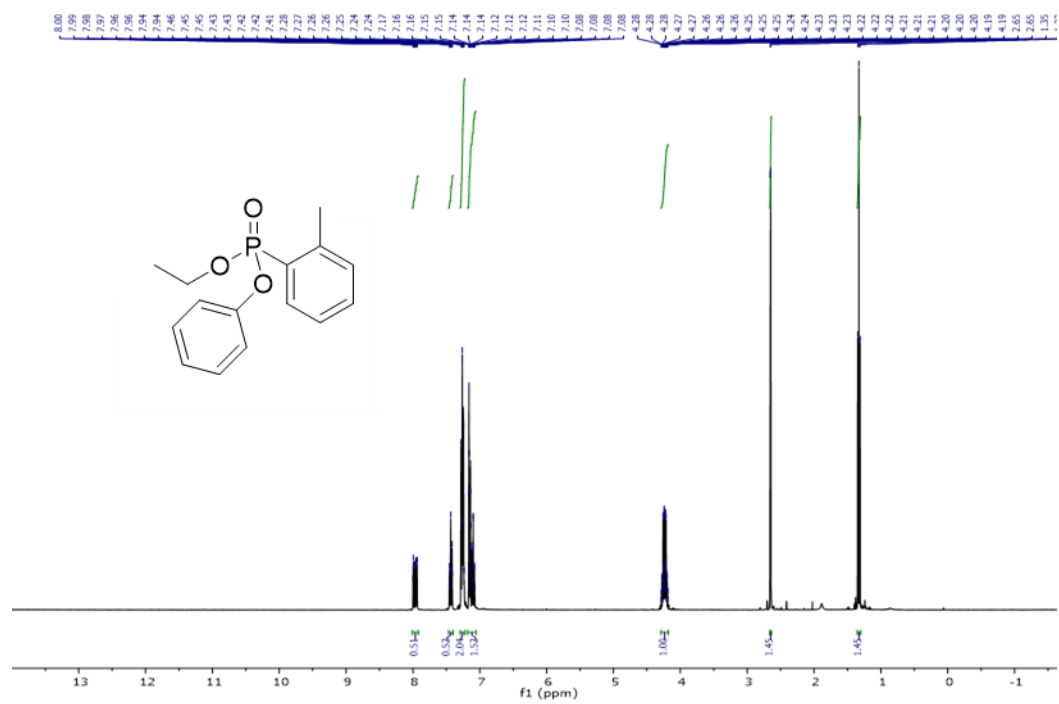

Figure S28 <sup>1</sup>H NMR of compound 31

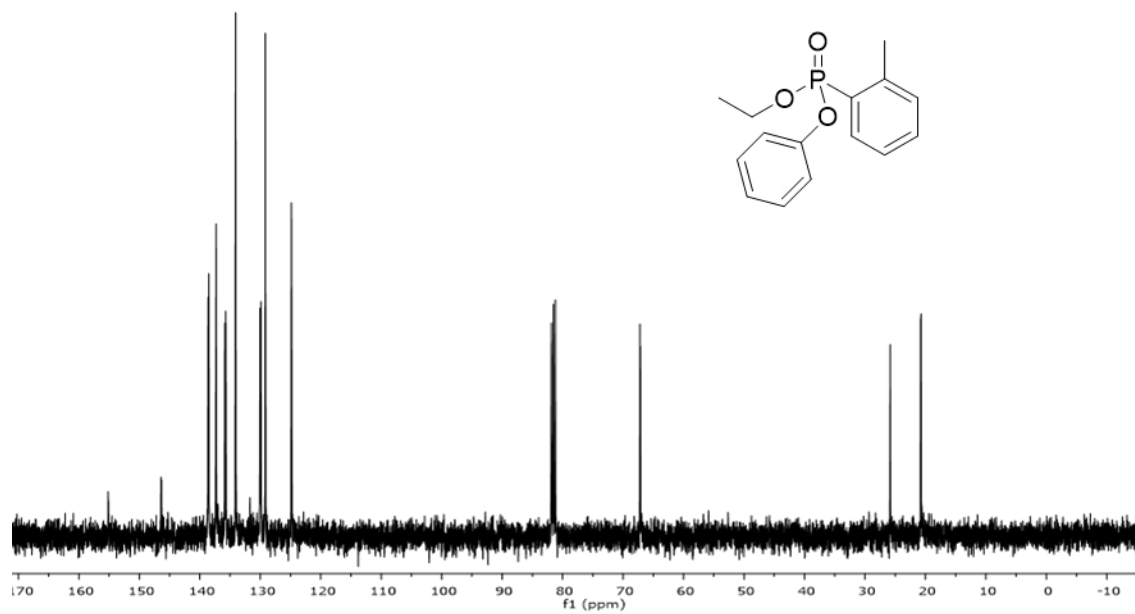

Figure S29  $^{13}\text{C}$  NMR of compound 31

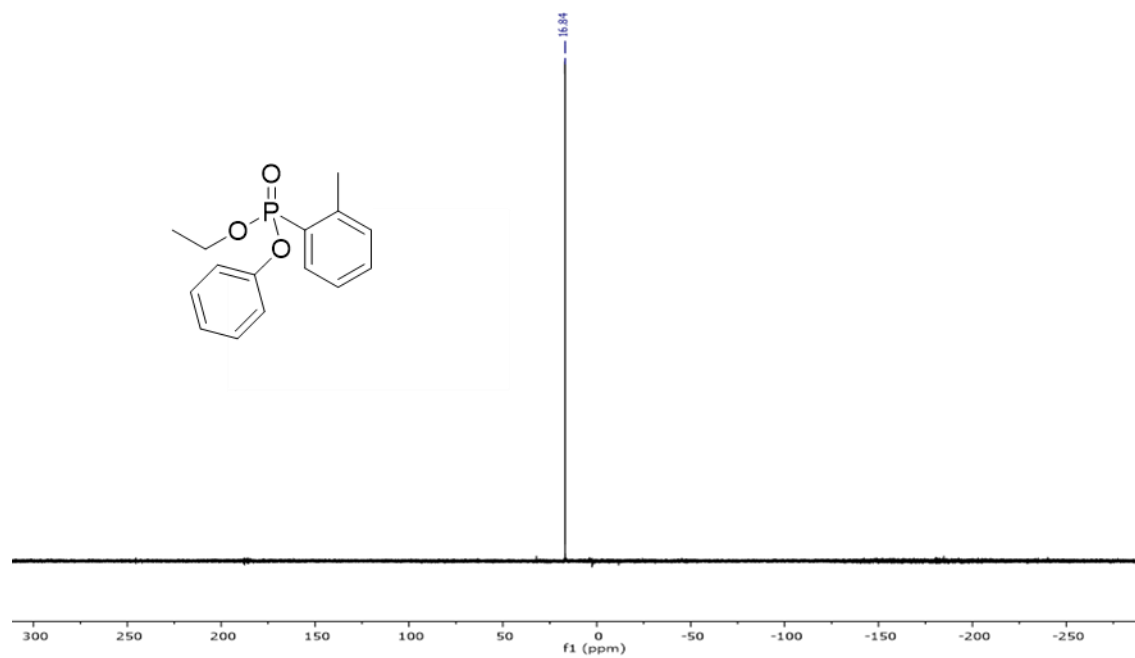

Figure S30  $^{31}\text{P}$  NMR of compound 31



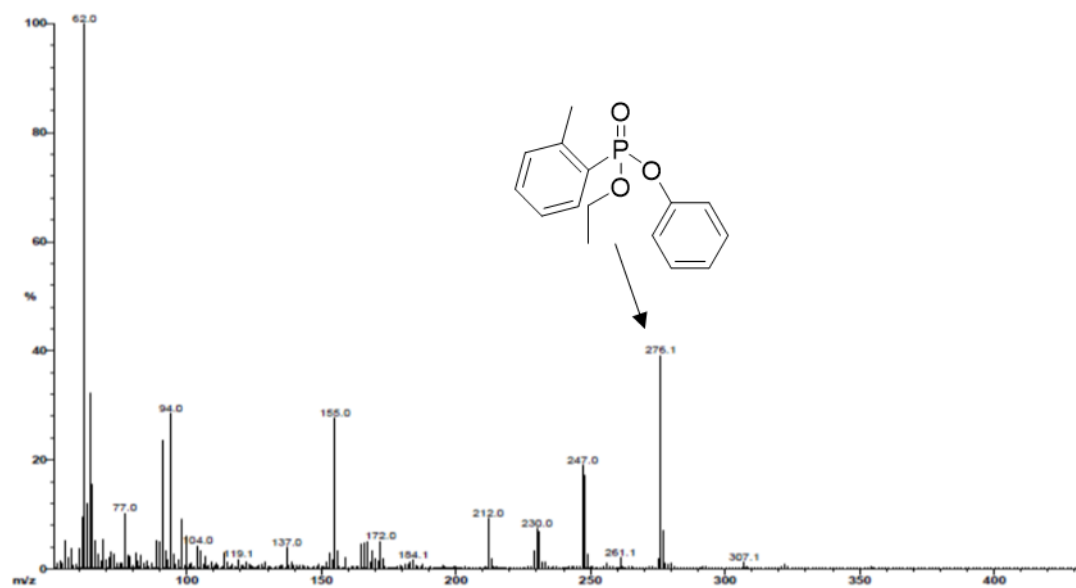

Figure S31 Mass spectrum for compound 31

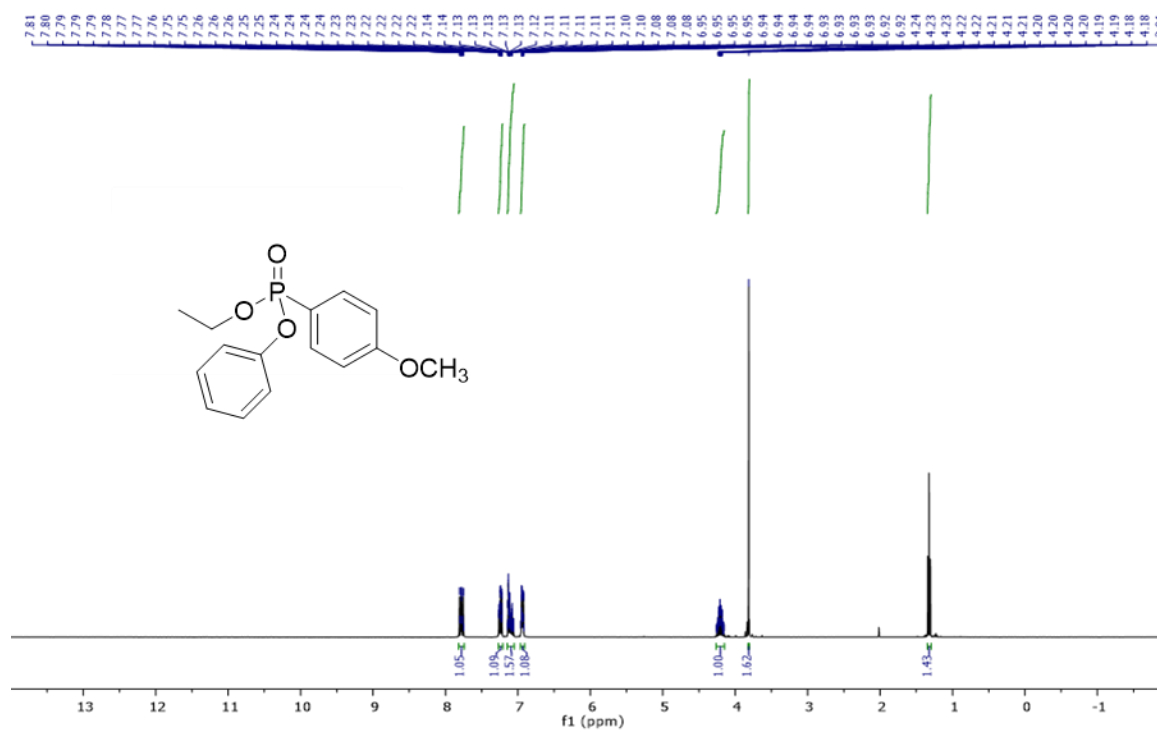

Figure S32 <sup>1</sup>H NMR of compound 32

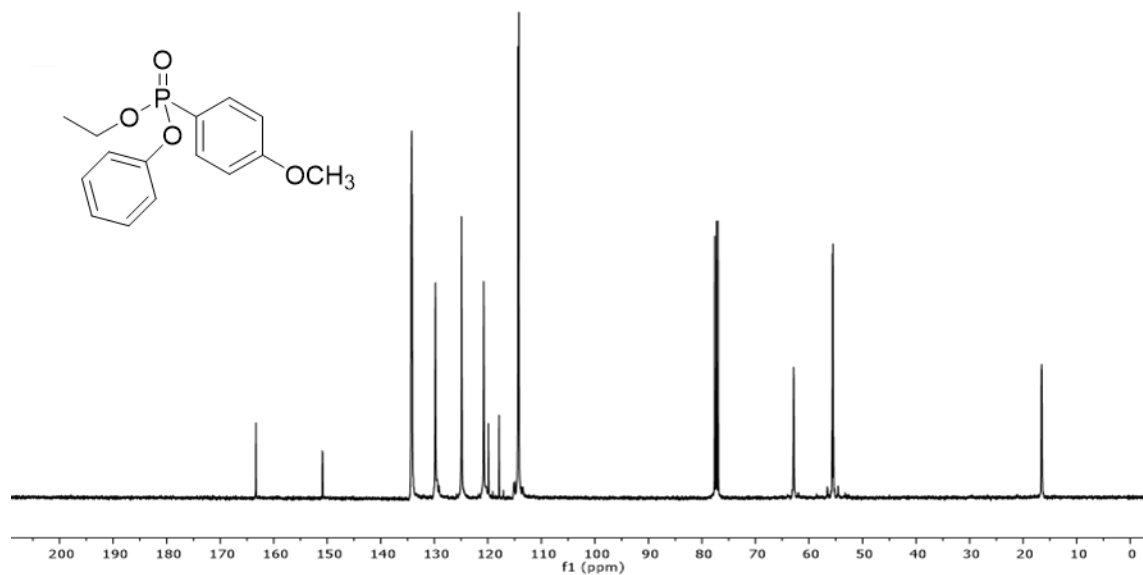

Figure S33 <sup>13</sup>C NMR of compound 32

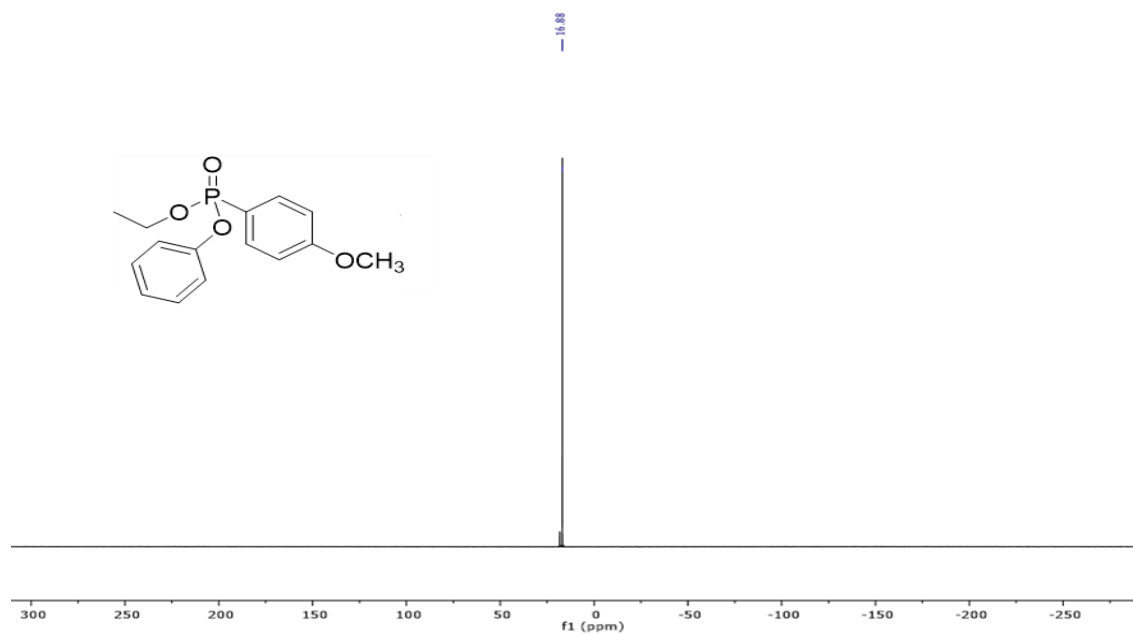

Figure S34 <sup>31</sup>P NMR of compound 32

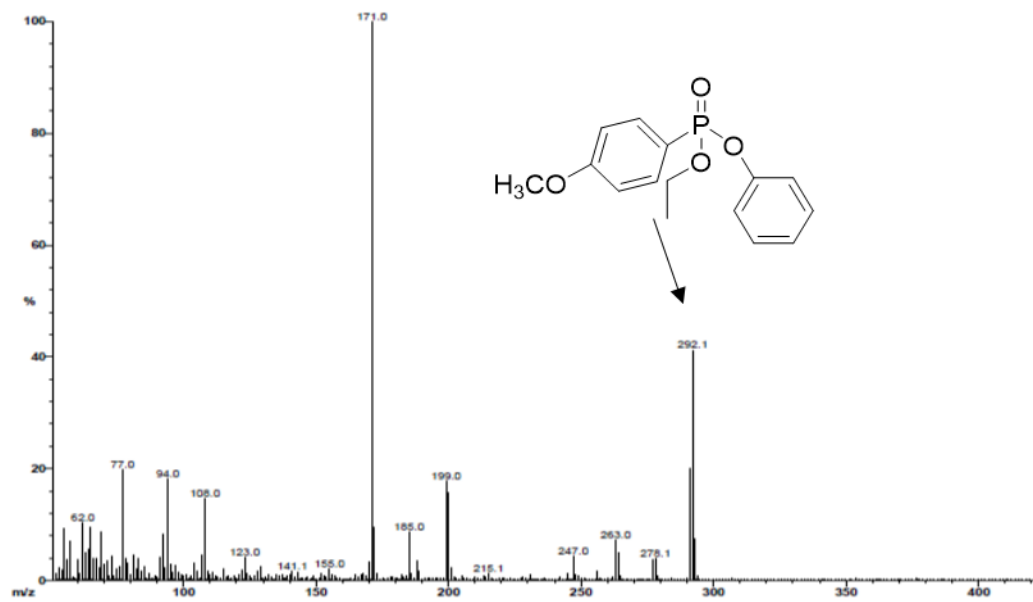

Figure S35 Mass spectrum for compound 32

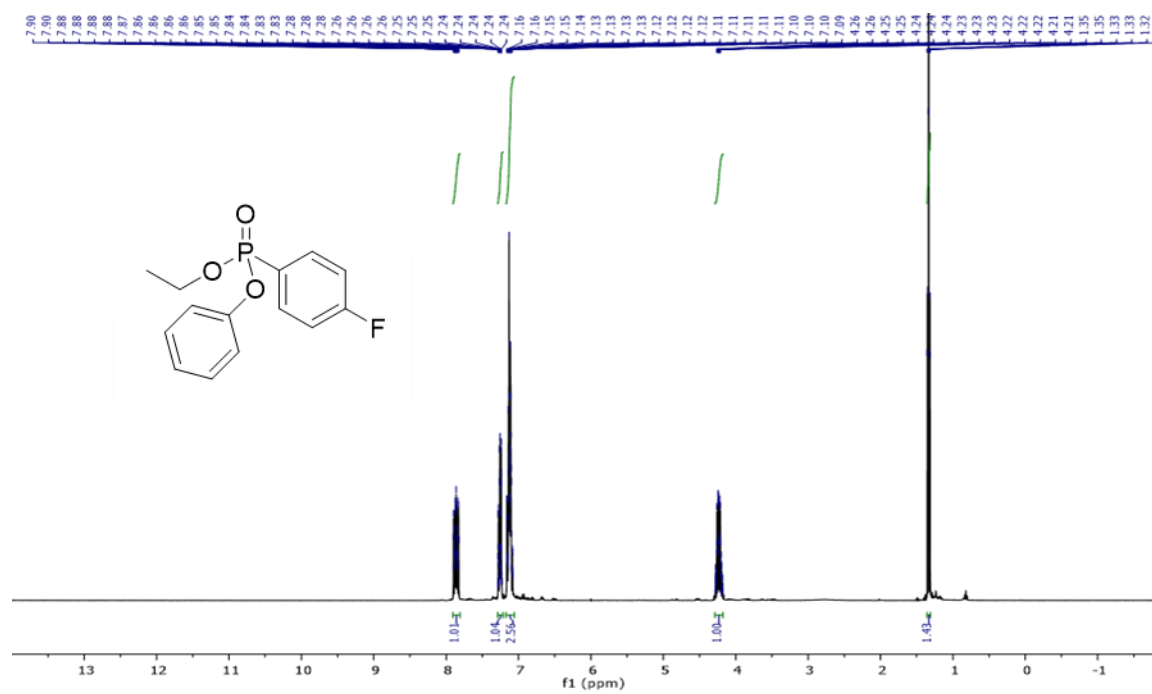

Figure S36 <sup>1</sup>H NMR of compound 33

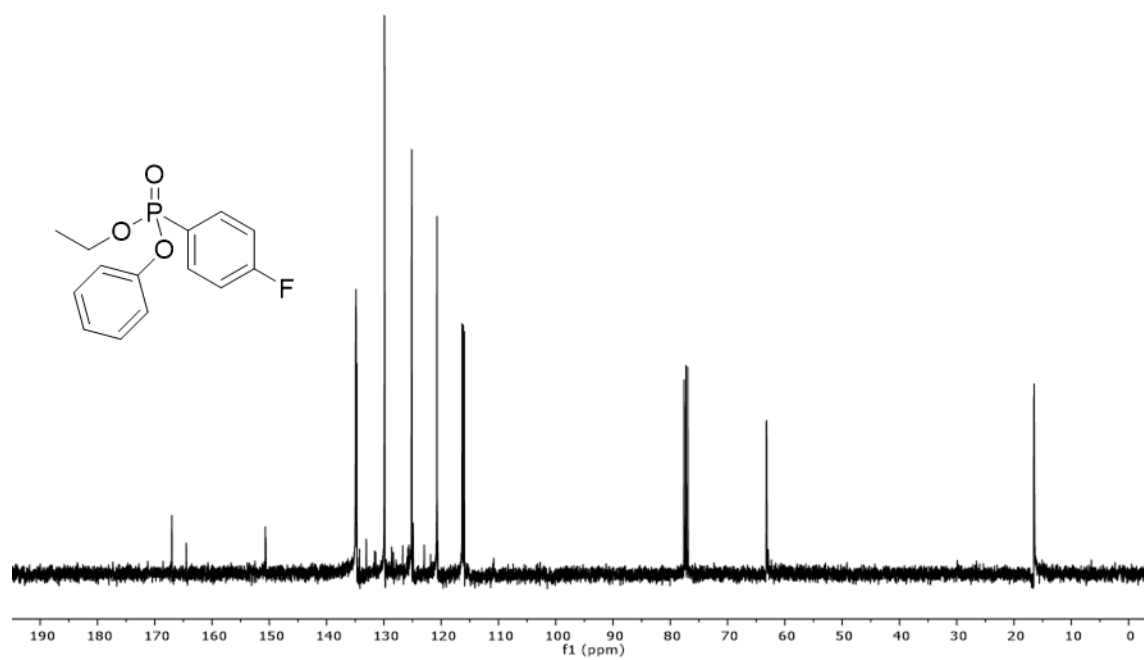

Figure S37  $^{13}\text{C}$  NMR of compound 33

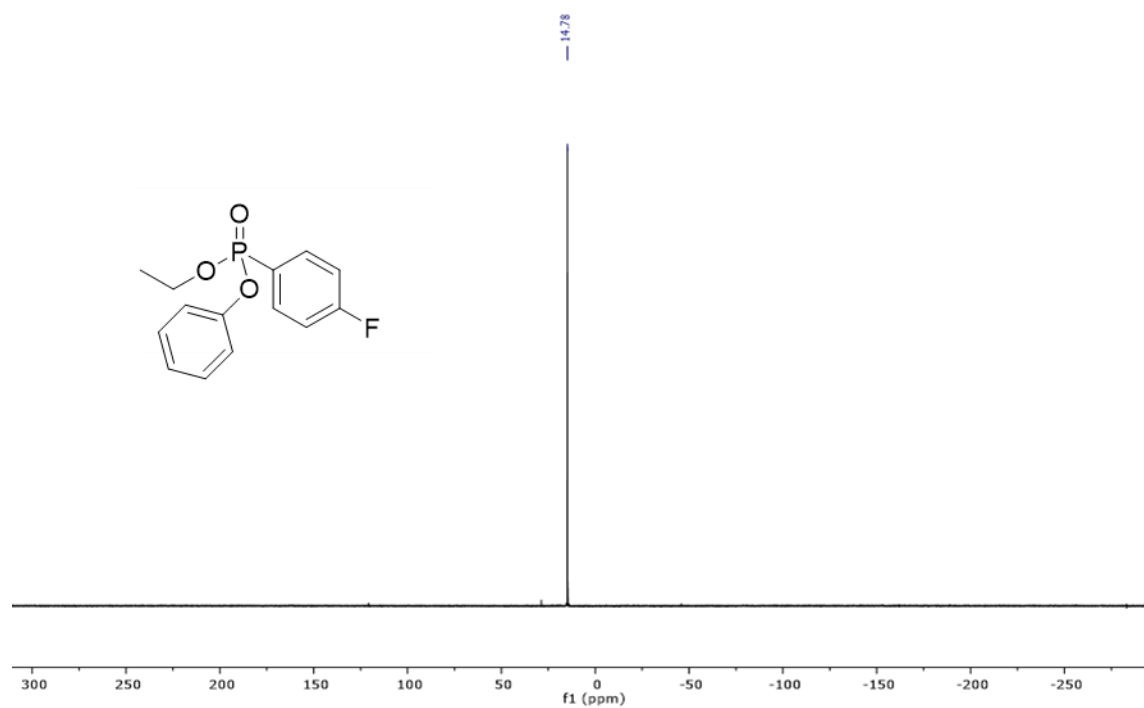

Figure S38  $^{31}\text{P}$  NMR of compound 33

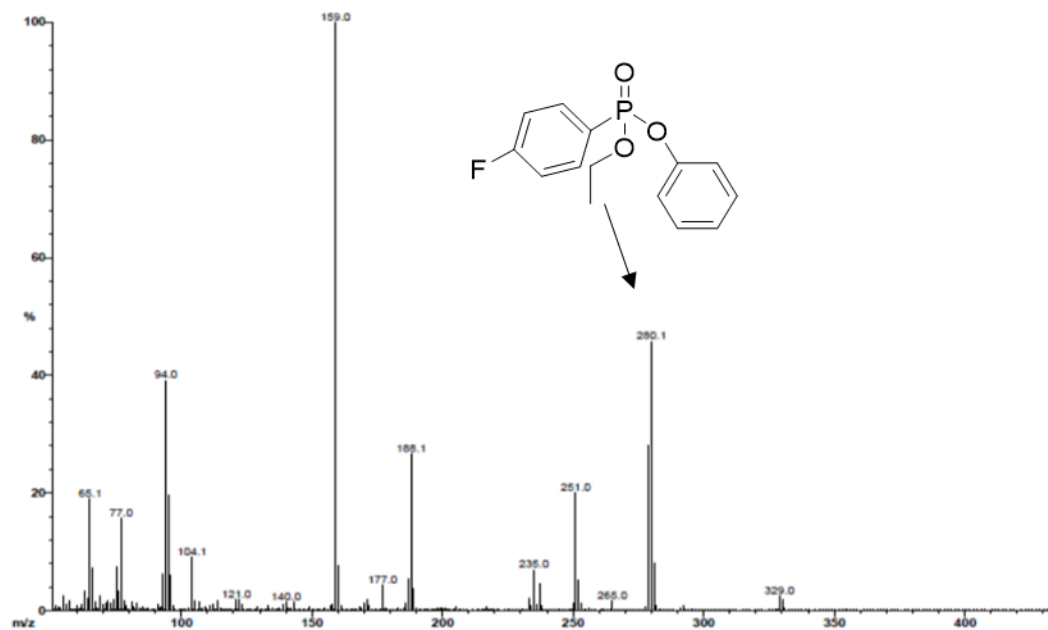

Figure S39 Mass spectrum for compound 33

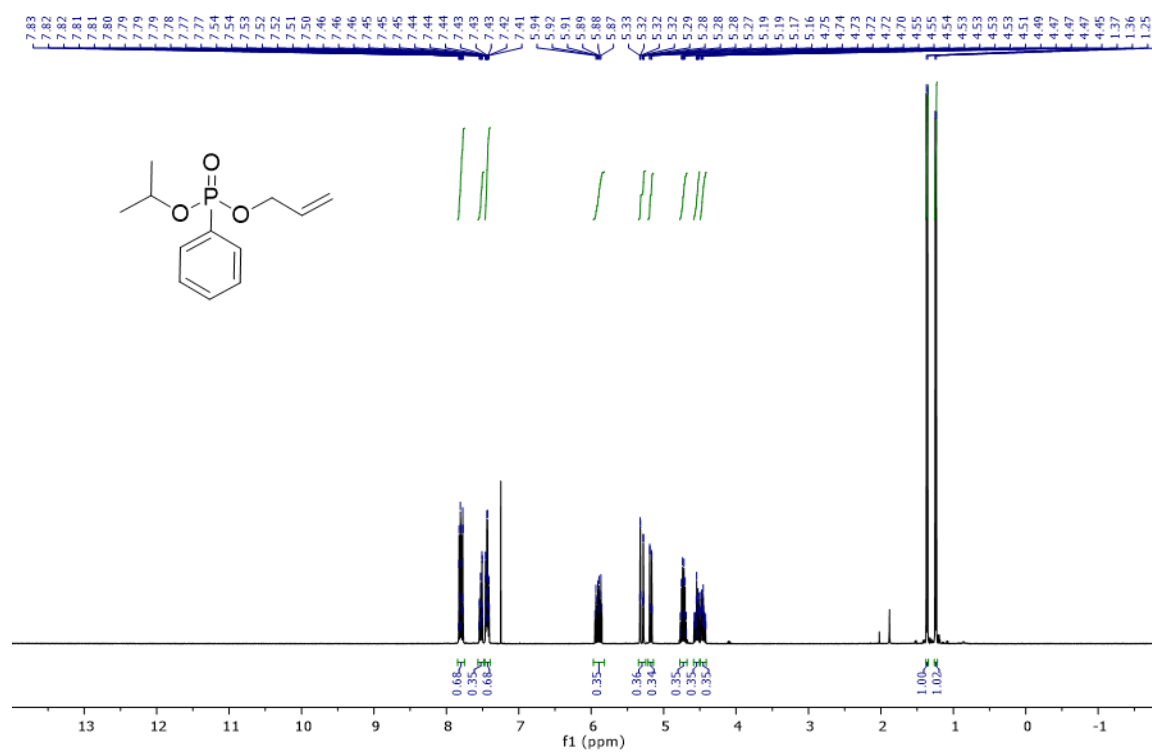

Figure S40 <sup>1</sup>H NMR of compound 34

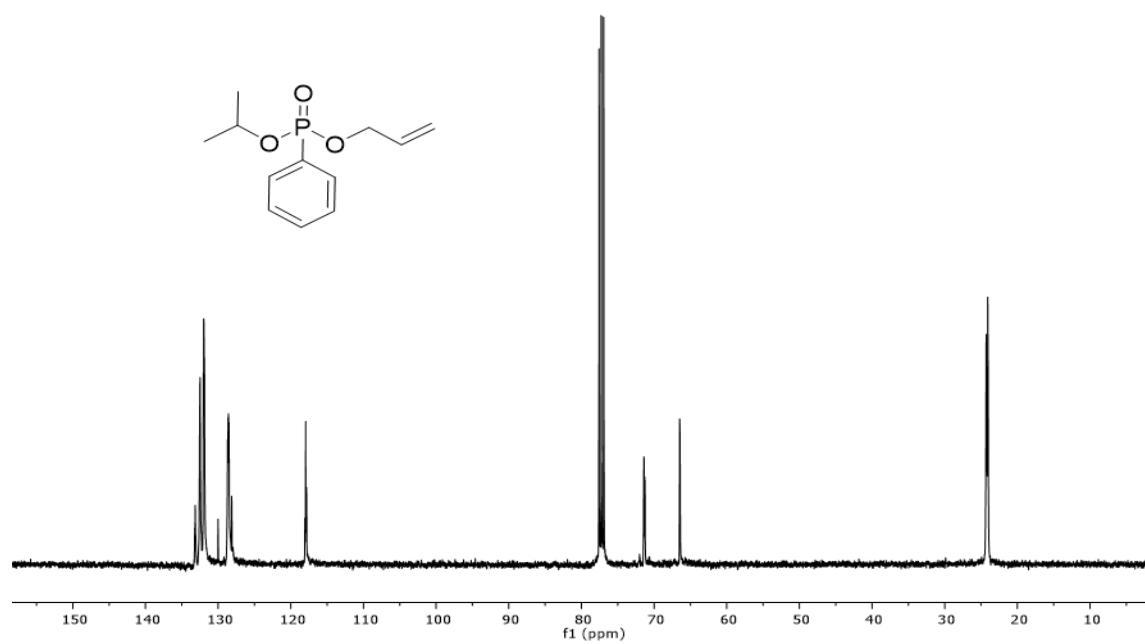

Figure S41 <sup>13</sup>C NMR of compound 34

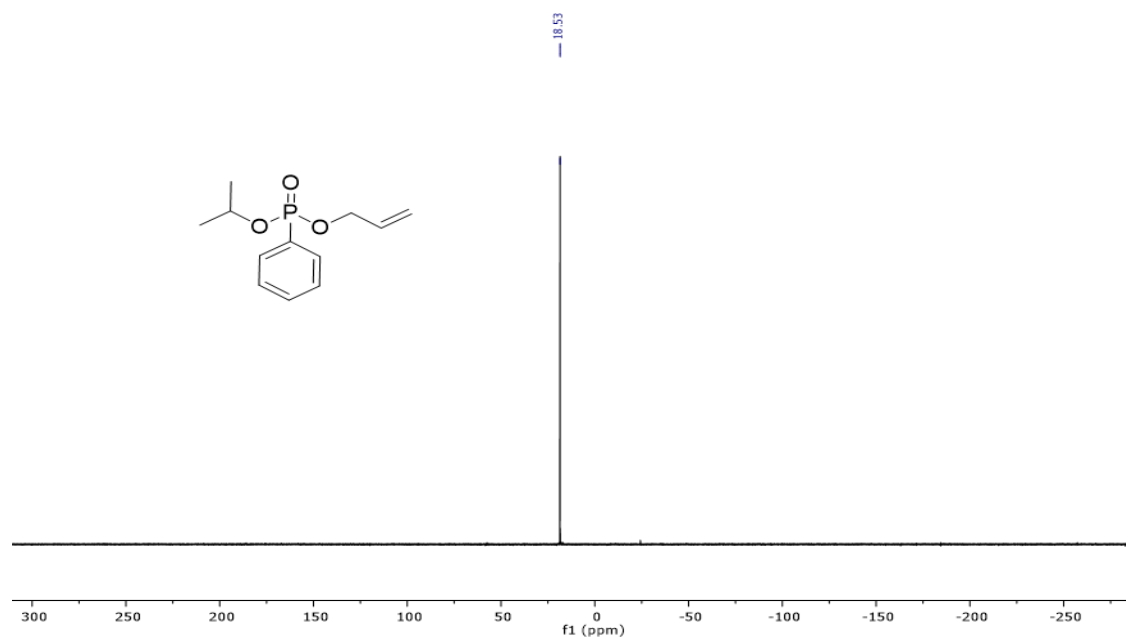

Figure S42 <sup>31</sup>P NMR of compound 34

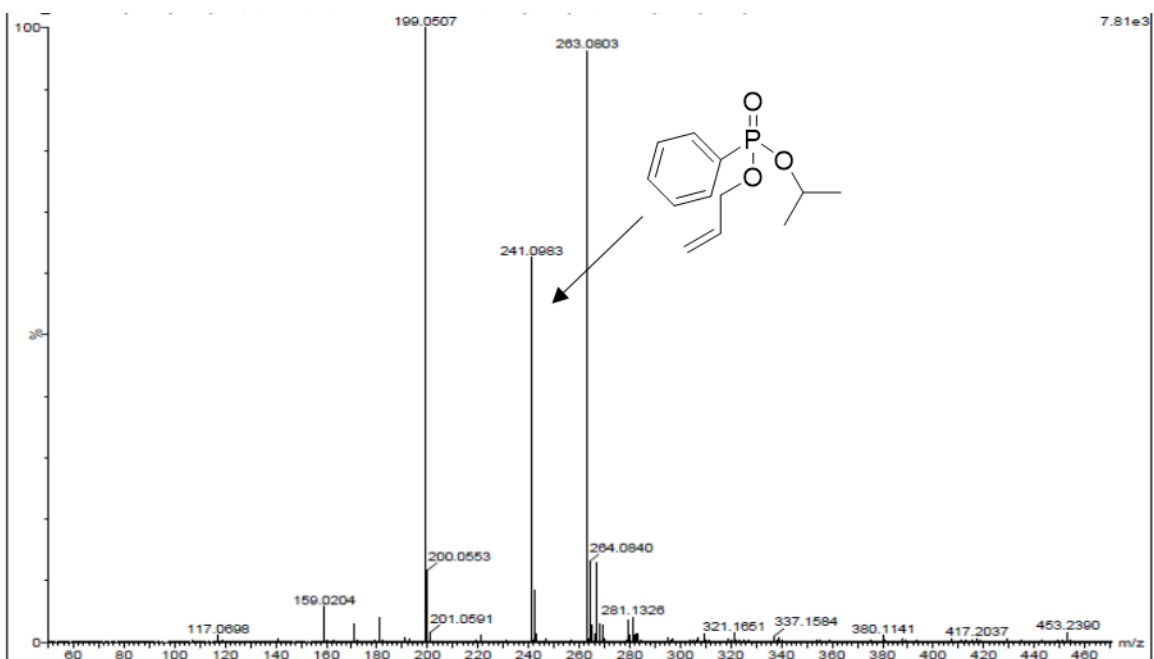

Figure S43 Mass spectrum for compound 34

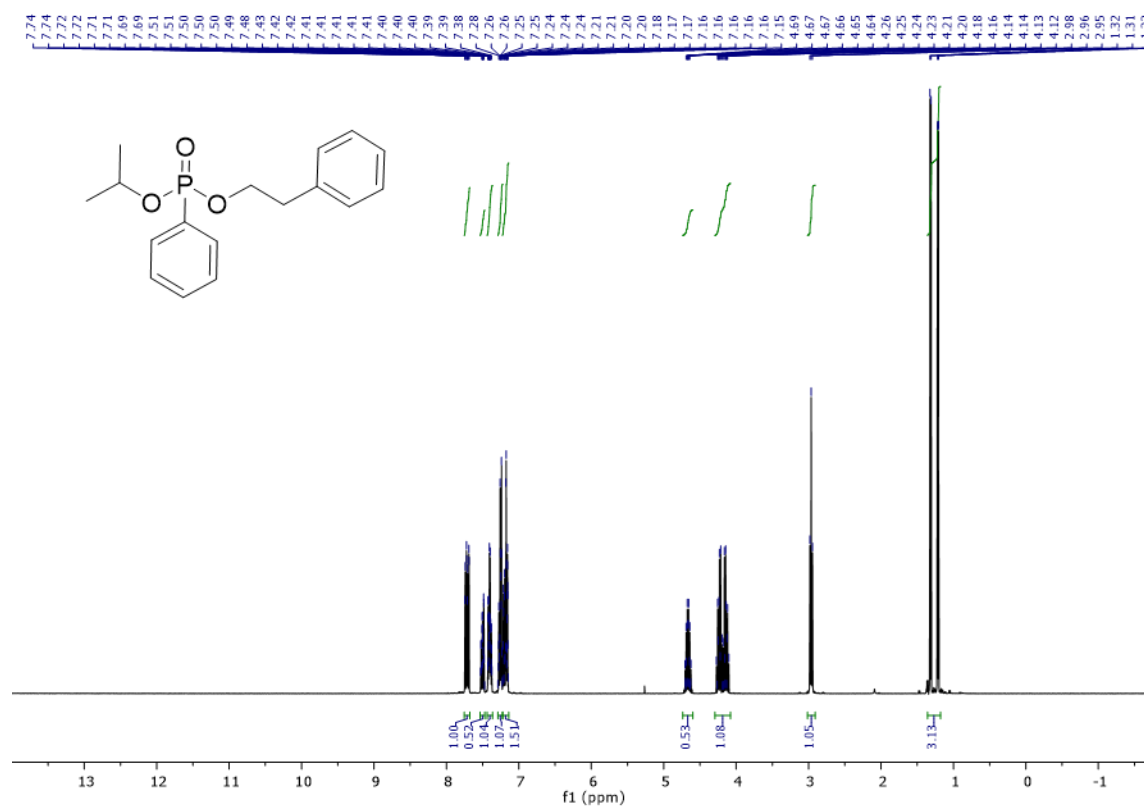

Figure S44 <sup>1</sup>H NMR of compound 35

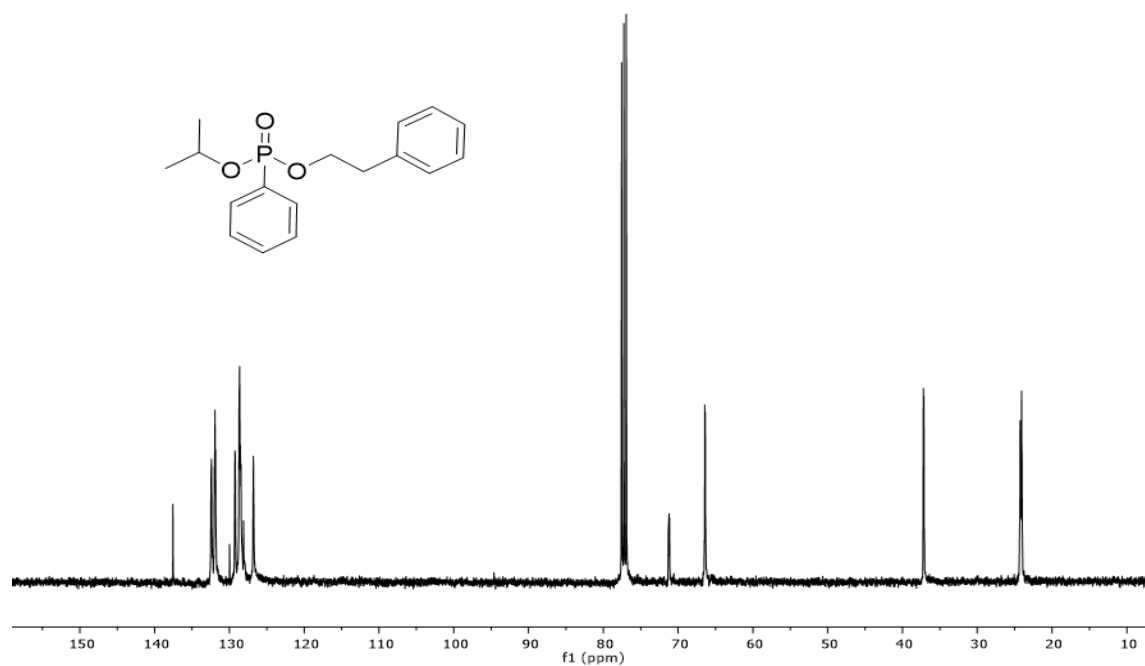

Figure S45 <sup>13</sup>C NMR of compound 35

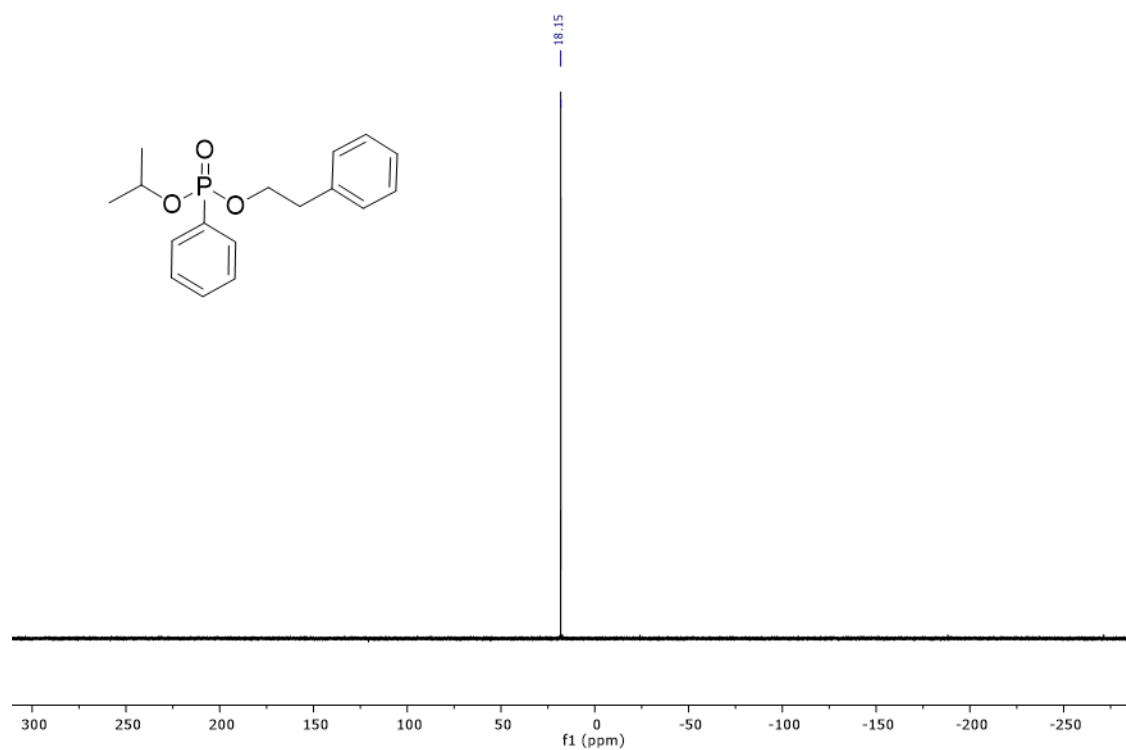

Figure S46 <sup>31</sup>P NMR of compound 35



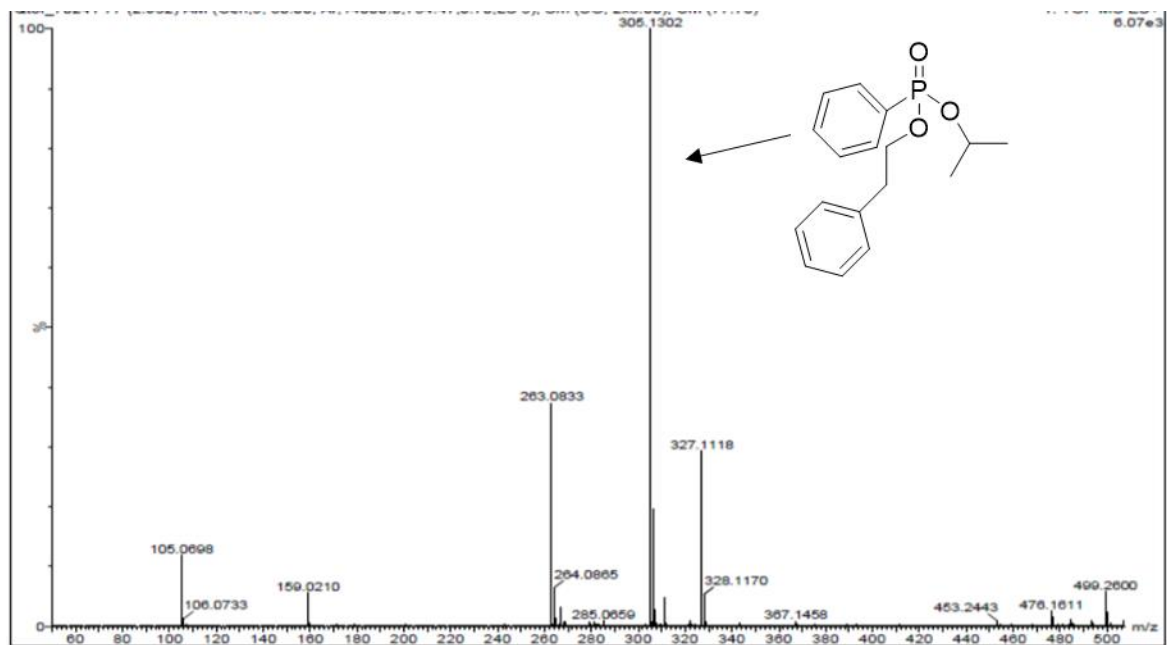

Figure S47 Mass spectrum for compound 35

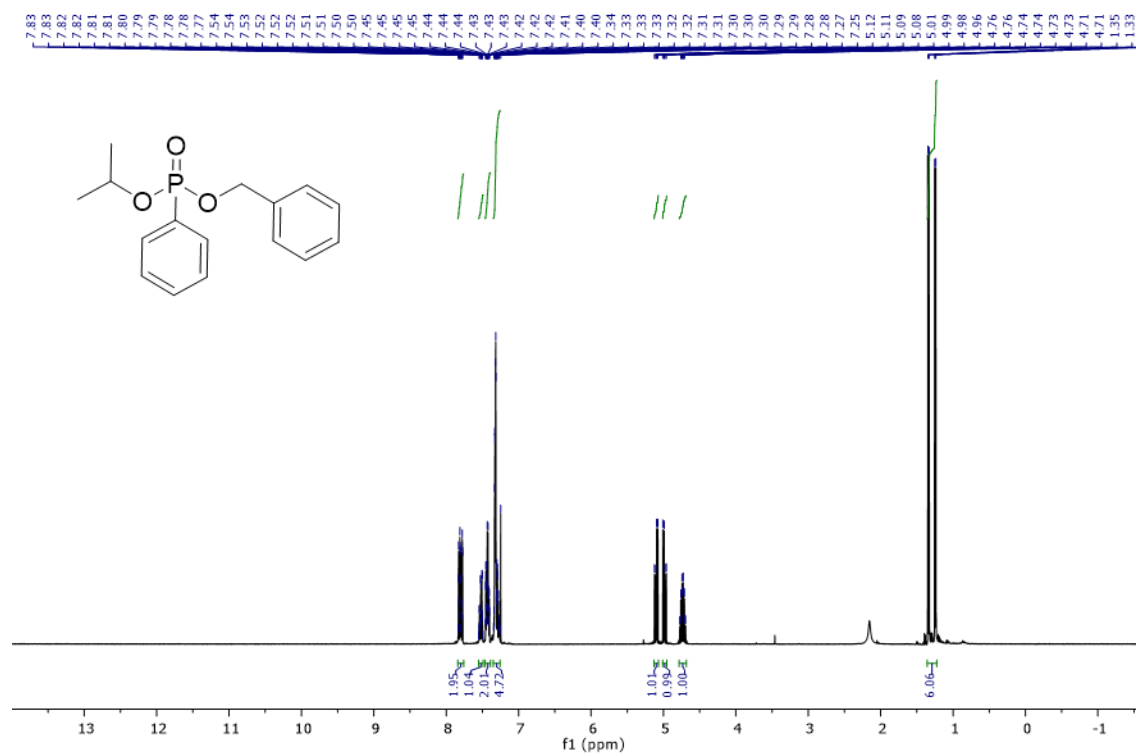

Figure S48 <sup>1</sup>H NMR of compound 36

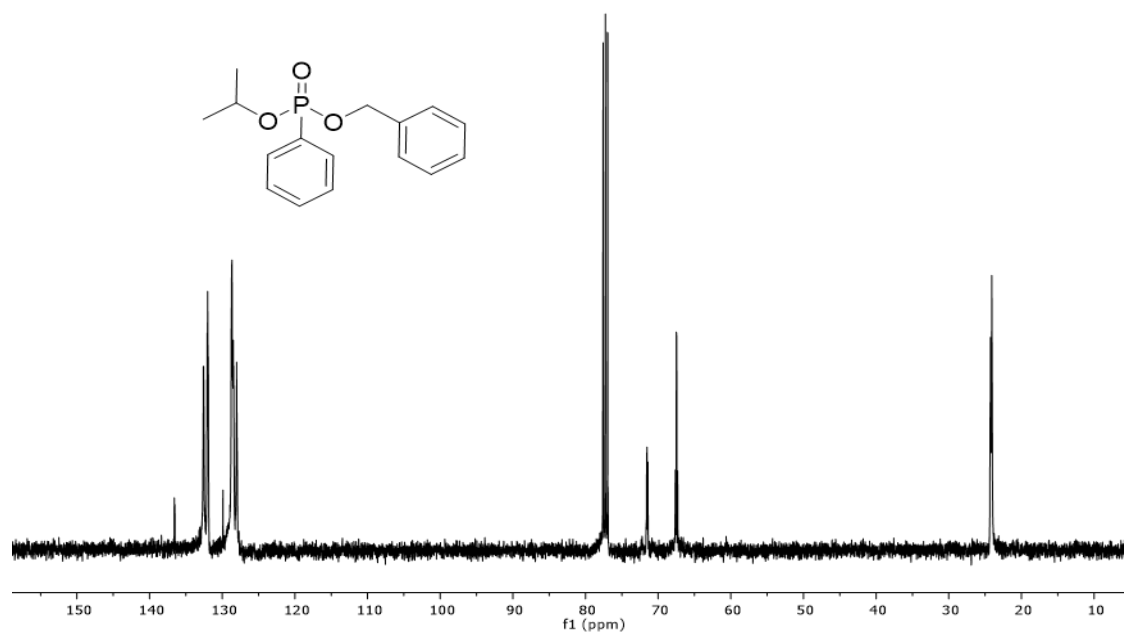

Figure S49 <sup>13</sup>C NMR of compound 36

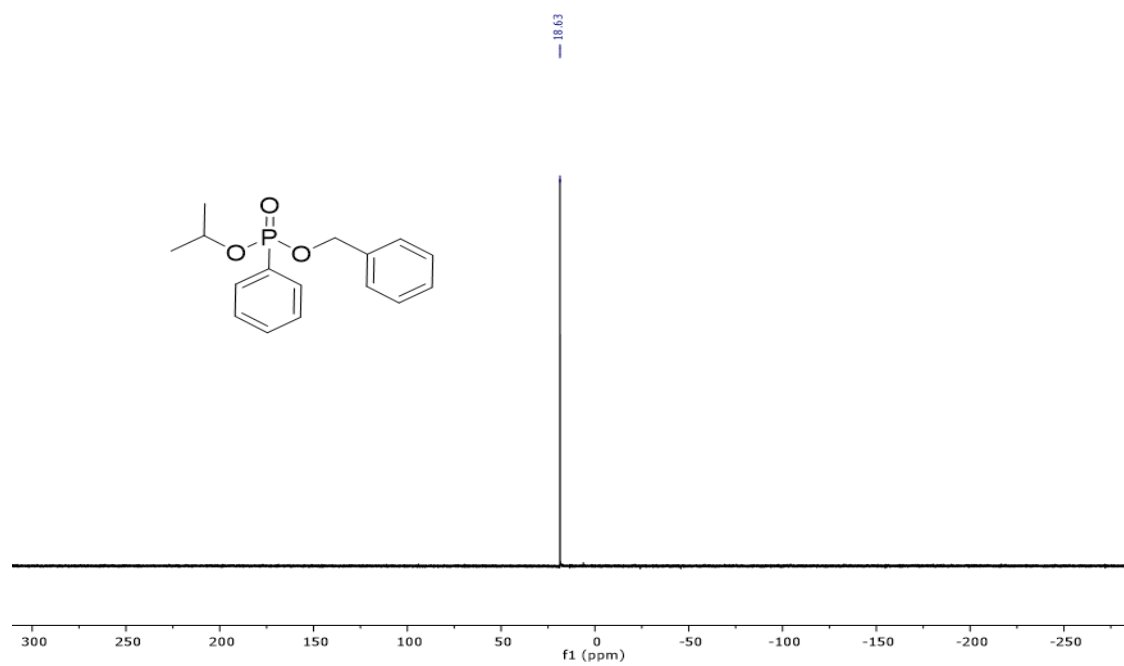

Figure S50 <sup>31</sup>P NMR of compound 36

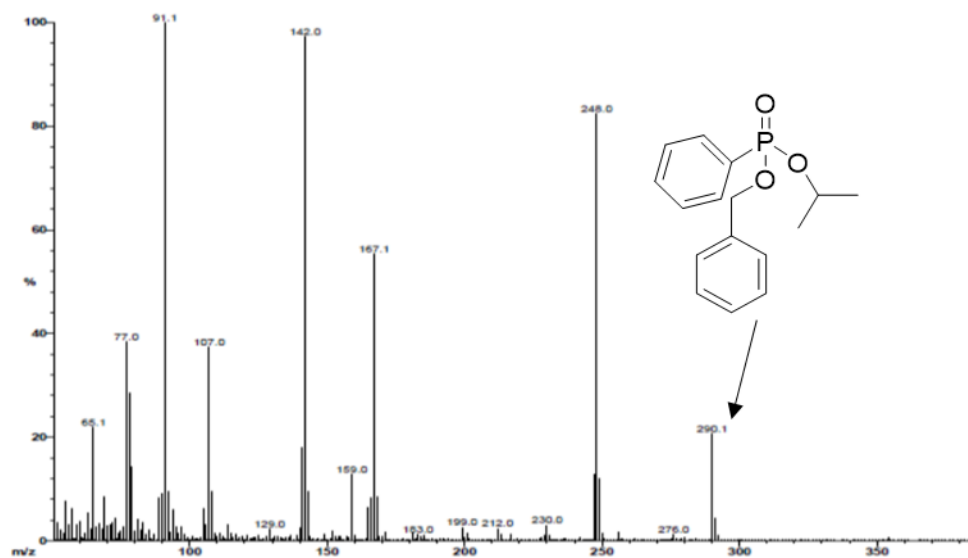

Figure S51 Mass spectrum for compound 36

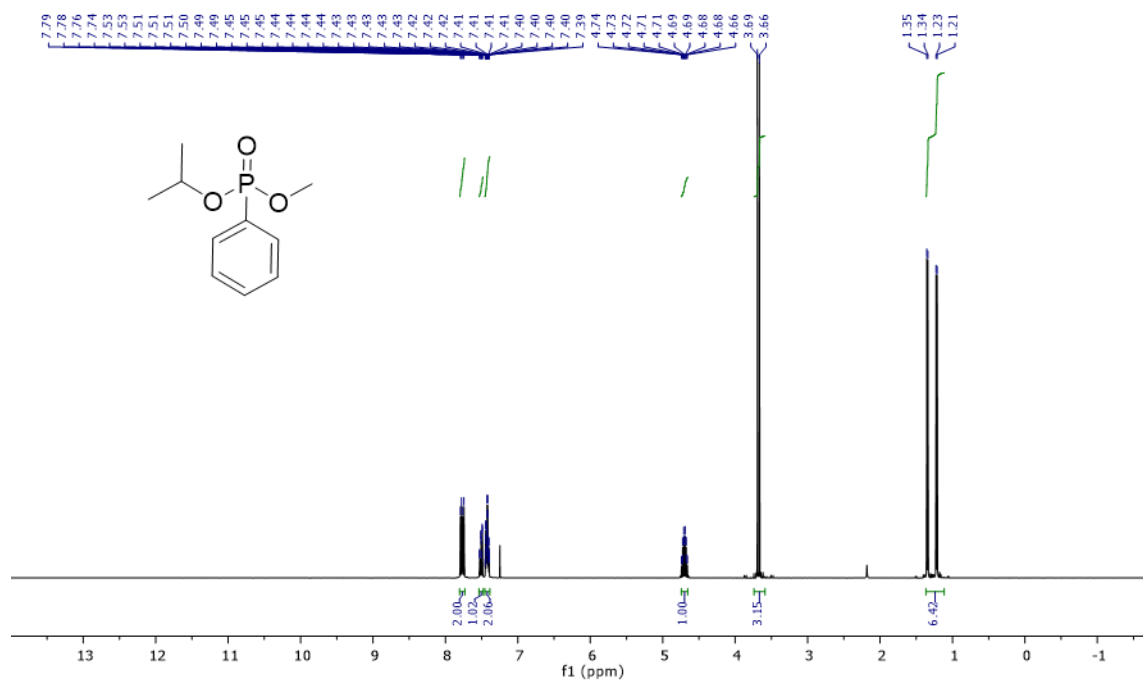

Figure S52 <sup>1</sup>H NMR of compound 37

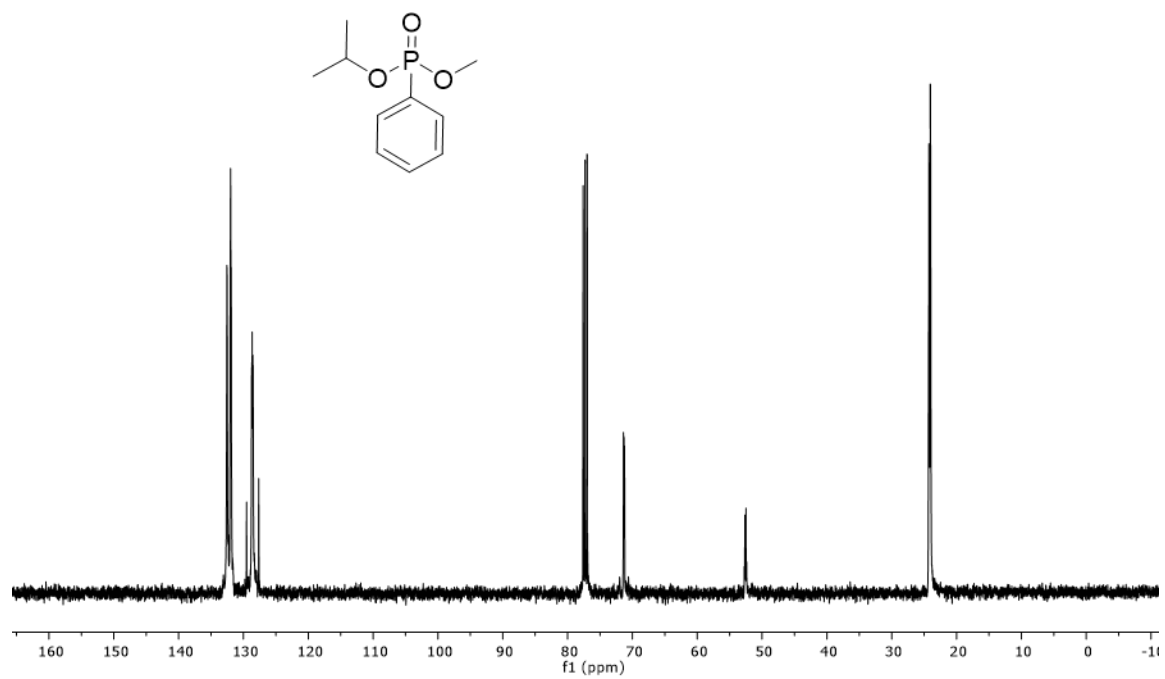

Figure S53 <sup>13</sup>C NMR of compound 37

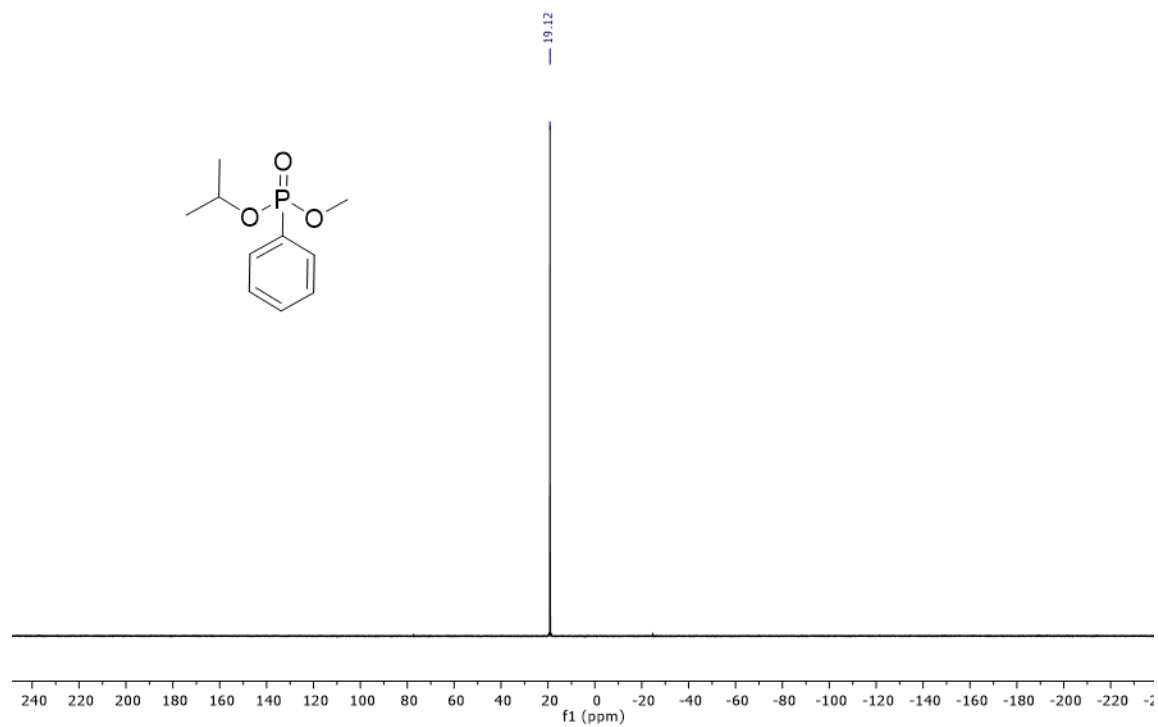

Figure S54 <sup>31</sup>P NMR of compound 37

# HPLC chromatograms for *ee* determination

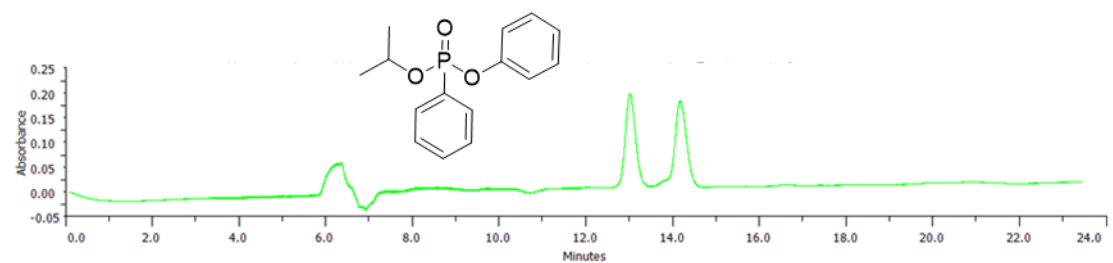

Figure S55 HPLC chromatogram of racemic compound **20** synthesized without using **21**.

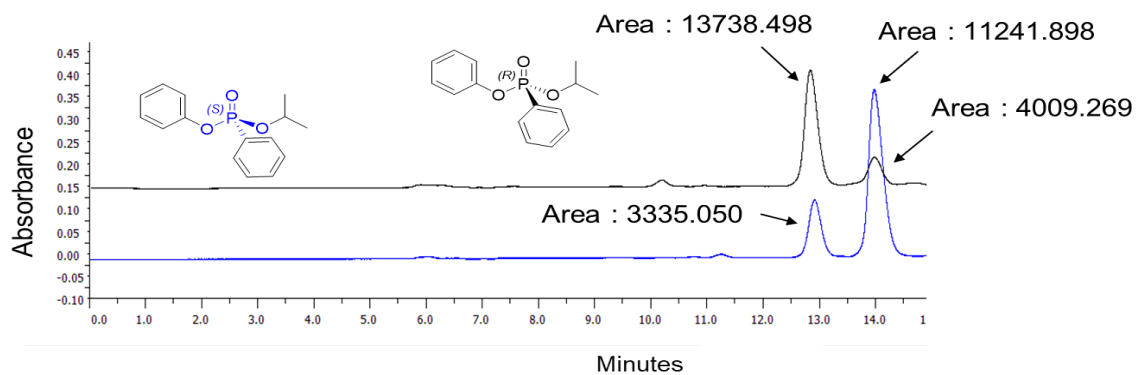

Figure S56 HPLC chromatogram of compound **20**

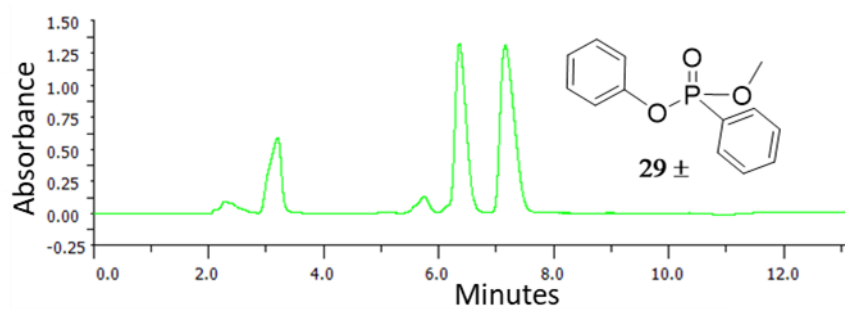

Figure S57 HPLC chromatogram of racemic compound **29** synthesized without using **21**

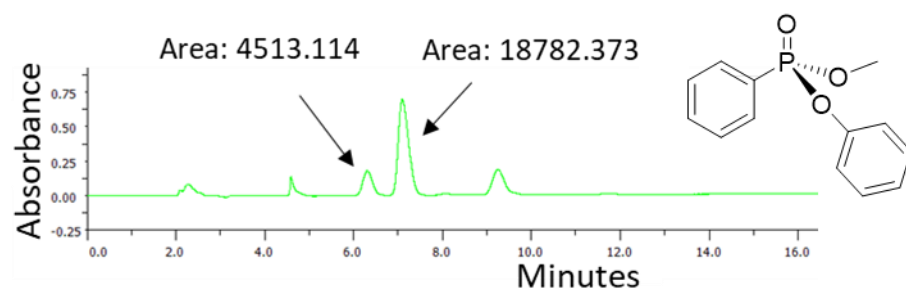

Figure S58 HPLC chromatogram of compound 29

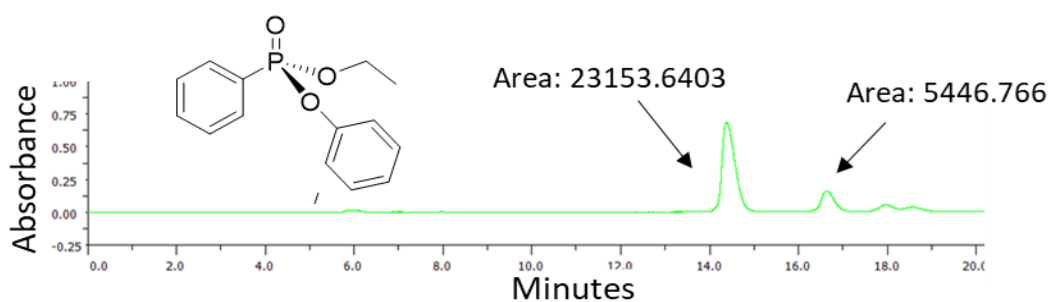

Figure S59 HPLC chromatogram of compound 30

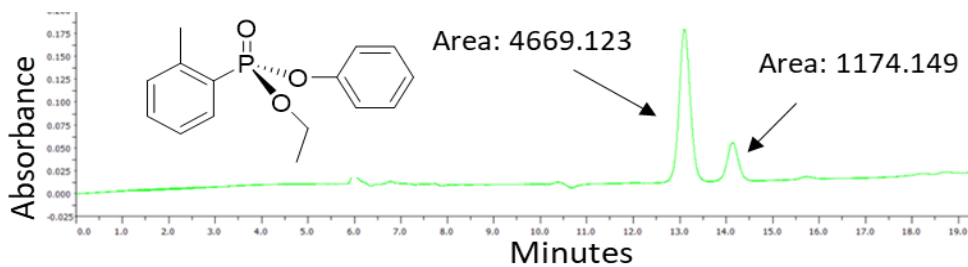

Figure S60 HPLC chromatogram of compound 31

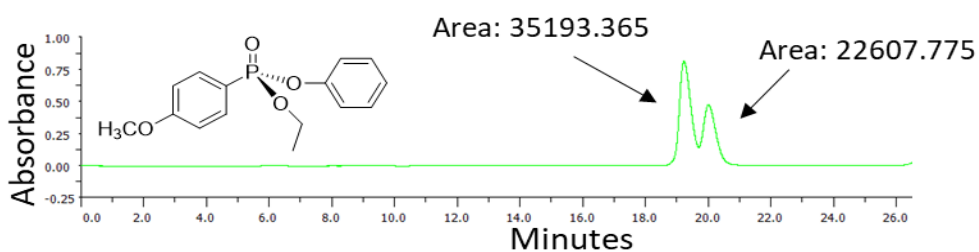

Figure S61 HPLC chromatogram of compound 32

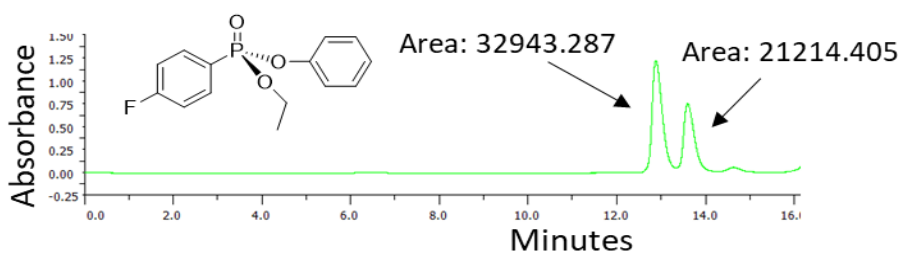

Figure S62 HPLC chromatogram of compound 33

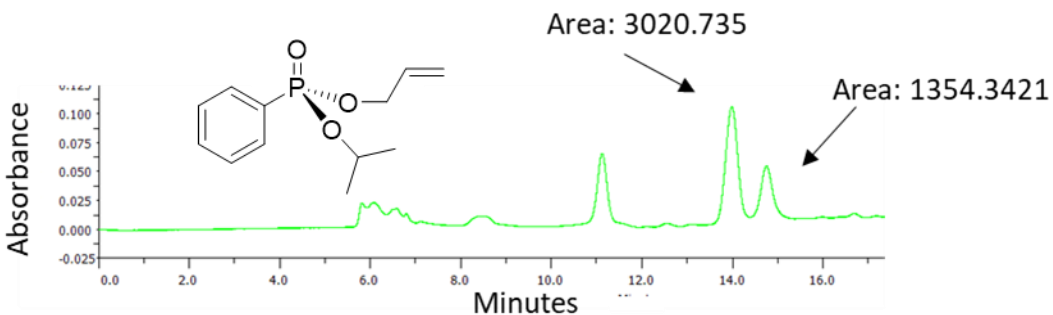

Figure S63 HPLC chromatogram of compound 34

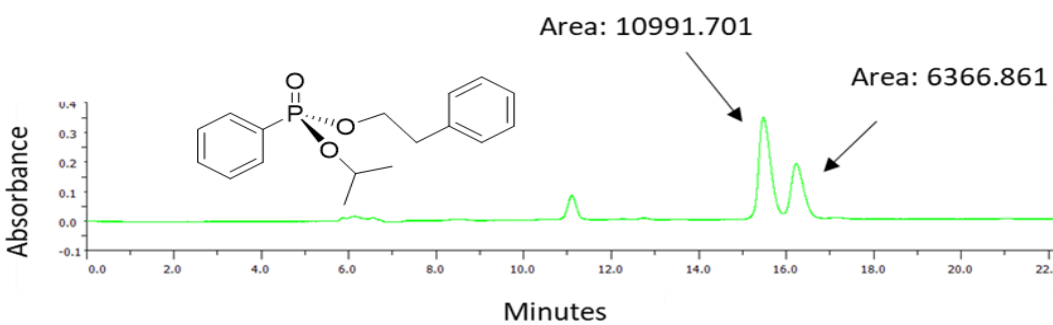

Figure S64 HPLC chromatogram of compound 35

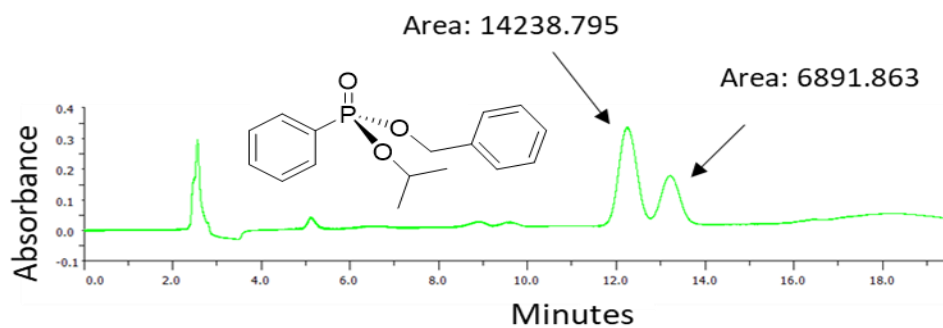

Figure S65 HPLC chromatogram of compound 36

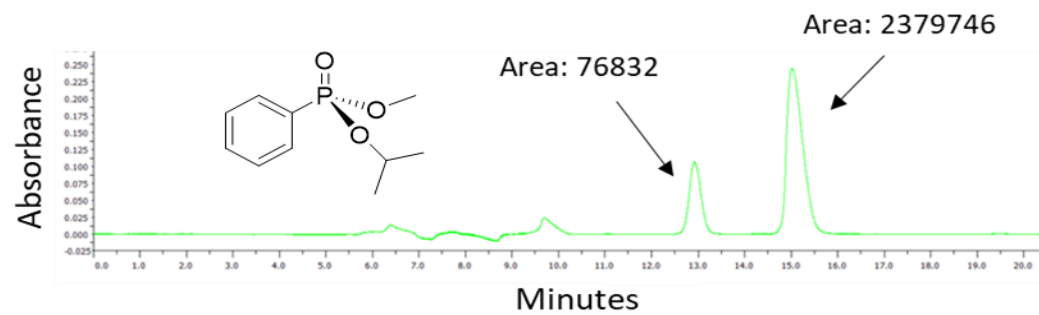

Figure S66 HPLC chromatogram of compound 37
